# Supplementary material
Source: PubMed Central journal article supplement (PMC6368855)
Supplement: NIHMS1518014-supplement-Supplemental_Material.pdf [file NIHMS1518014-supplement-Supplemental_Material.pdf]

## 1 Supplementary Figure Legends

2 **Figure S1, related to Figures 1 and 2.** Summary of analysis using control sequences from  
3 flanking non-ChIP regions. (A) Comparison of GC-content under the two strategies; current  
4 strategy: using ChIP peaks of other DBPs, shown along X-axis; alternative strategy: using  
5 non-ChIP regions flanking the ChIP peaks of the same DBP, shown along Y-axis. All cases  
6 show high concordance, Pearson correlation coefficients are: 0.98 for positive training set,  
7 0.97 for control training set, 0.98 for positive validation set, and 0.96 for control validation  
8 set. (B) Main results of our manuscript under the re-analysis using control sequences from  
9 flanking non-ChIP regions. Heatmap of negative- $\log_{10}$  transformed Bonferroni corrected p-  
10 values for the four types of shape-motifs of each TF. White cells indicate no significant  
11 motif. 'K' or 'G' after a TF's name denotes K562 or Gm12878 cells, respectively.

12 **Figure S2, related to Figures 1, 2 and 4.** (A)—(D) Main results of our manuscript under  
13 the re-analysis using control sequences from flanking non-ChIP regions. (A) Numbers of  
14 TFs with each of the four types of shape-motifs. (B) Length distribution of shape-motifs. (C)  
15 Boxplots of relative distances of sequence-, shape-, and overlapping-sites from ChIP-seq  
16 peak-summits. (D) The strategy of taking flanking non-ChIP regions as controls can still  
17 produce GC-content mismatches across positive and control sequences, and the extents are  
18 similar to the strategy of taking control sequences from ChIP-peaks of other DBPs.  
19 Scatterplots show GC-content of positive and control sequences in the validation sets  
20 across all DBP datasets. (E) Left panel shows boxplots of shape-feature values in the initial  
21 windows selected randomly by ShapeMF and in the windows that match the final shape-  
22 motif (blue and red boxplots, respectively). Right panel shows the final shape-motif and the  
23 sequence motif computed from the sequences underlying this shape-motif. The shown  
24 example is a HelT motif of MAX. (F) Barplots showing the fraction (%) of shape-only peaks  
25 and sequence-based (sequence-only plus co-occurrence) peaks in different types of  
26 regulatory regions in the Gm12878 cell-line. Shape-only peaks are more enriched in  
27 putative enhancer regions than are sequence-based peaks; significant enrichments are  
28 marked with stars.

29 **Figure S3, related to Figures 2 and 4.** (A) Scatterplot showing  $F_{1/3}$ -scores of shape-motifs  
30 across training and validation datasets. (B) Distribution of recall of shape-motifs on  
31 validation datasets. (C) Scatterplot showing a monotonically increasing relationship  
32 between the fraction of overlapping sites of a DBP and the Information Content per  
33 Position (ICP) derived from sequence-logos underlying its shape-motifs. Each circle  
34 denotes a DBP and the mean ICP is the mean of ICP its different shape-motifs. (D)  
35 Histograms showing distributions of gkmSVM scores of sequence-only, overlapping, and  
36 shape-only sites (pooled across all DBPs). A site's score is the maximum gkmSVM score of  
37 any 10-mer within that site. (E) Scatterplots showing the % of shape-only sites and

38 sequence-sites of each DBP that have a minimum overlap (% of the site's length, not  
39 stipulated to be reciprocal) with sequence-sites of any other DBP.

40 **Figure S4, related to Figures 2 and 4.** (A) Histograms of Information Content per Position  
41 (ICP), GC-content, and length of shape- and sequence-motifs. The ICP and GC-content for a  
42 shape-motif is derived from the sequences underlying the occurrences of the shape-motif.

43 **Figure S5, related to Figure 3.** (A) Sequence-motifs underlying shape-motifs in HT-SELEX  
44 and ChIP-Seq are generally similar. For each panel, the shape-motifs are shown in the left  
45 and sequence-motifs underlying those shape-motifs are shown in the right (top motif is  
46 from ChIP-derived shape-motif, bottom motif is from SELEX-derived shape-motif). For  
47 16/36 cases, the two sequence-logos have a very similar core (shown with double \*\*). CTCF  
48 Roll motif (3rd column, 2nd motif from the bottom) and NRF1 Roll motif (4th column, 5th  
49 motif) are two such examples of extreme difference in length yet high similarity in some  
50 core. For 6/36 cases (shown with single \*), such agreement is modest. (B) Statistical  
51 significance vs. IoU (Intersection over Union) for each pair of shape-motifs derived from  
52 HT-SELEX and ChIP-Seq.

53 **Figure S6, related to Figure 4.** Fraction of sequence-only, co-occurrence, and shape-only  
54 peaks within different deciles of ChIP-Seq intensity (10 = peaks with top 10% intensity, 1 =  
55 peaks with lowest 10% intensity). Shown is the K562 cell-line dataset.

56 **Figure S7, related to Figure 4.** Fraction of sequence-only, co-occurrence, and shape-only  
57 peaks within different deciles of ChIP-Seq intensity (10 = peaks with top 10% intensity, 1 =  
58 peaks with lowest 10% intensity). Shown is the Gm12878 cell-line dataset.

59 **Figure S8, related to Figures 2 and 4.** Shape-motifs and shape-specific binding occur  
60 similarly across sequence-specific TFs and non-specific DBPs. (A-C) Density histograms  
61 showing density of TFs and non-specific DBPs binned according to the fraction of their  
62 genome wide peaks: sequence-only (A), shape-only (B), and co-occurrence peaks (C). Of  
63 note, the densities are unimodal and the modes of the two groups of proteins are very  
64 close. The generality of our results would not hold in case the densities for the two groups  
65 were skewed in opposite directions. (D) Fraction (%) of sequence-specific TFs and other  
66 non-specific DBPs with each type of shape-motif. (E) Distributions of information content  
67 per position (ICP) of shape-motifs from the two groups of proteins. Each box extends from  
68 the lower to upper quartile values of the data, with a line at the median. The whiskers  
69 extend from the box to show the range of the data.

70 **Figure S9, related to Figure 6.** (A) Histogram of the number of overlapping peaks  
71 between co-binding DBP pairs. Only the pairs with at least 100 overlapping peaks are  
72 included. (B) Shape-zinger DBPs (nodes) and the fraction (color-coded) of ChIP-Seq peaks  
73 of other DBPs with their shape-sites. For simplicity, edges connecting shape-zinger pairs

74 are omitted, but most zingers have large numbers of shape-sites in each other's peaks. (C)  
75 Histogram of inter-site distances at which DBP pairs show significant bias for co-binding.  
76 (D) Shape-motifs of TBX5 and NKX2-5 for MGW and Roll, and the corresponding sequence-  
77 motifs created from the underlying sequences.

78 **Figure S10, related to Figure 6.** Heatmaps showing the extent of shape-only binding for  
79 each DBP  $F_1$  (row-names) in the peaks where it co-binds with another DBP  $F_2$  (column-  
80 names). The extent is quantified as the log-transformed ratio of the number of shape-only  
81 peaks to sequence-based peaks of  $F_1$  in the co-binding peaks. The colored bars (row and  
82 column aligned) show the same statistic for the corresponding DBP computed from its  
83 entire set of peaks.

84 **Figure S11, related to Figure 7.** Shape-motifs of bHLH proteins showing that DBPs within  
85 the same family have different shape-motifs (H, M, P, and R denote motifs for HelT, MGW,  
86 ProT, and Roll, respectively). A feature is not shown for a DBP if the DBP does not have a  
87 shape-motif for that feature. All DBPs in the bHLH class for which ChIP-Seq assays were  
88 performed by ENCODE in the K562 cell-line and we could find at least one shape-motif are  
89 shown.

90 **Figure S12, related to Figure 4.** MITOMI-based ranks of sequence-only, overlapping, and  
91 shape-only sites.

## 92 **Supplementary Tables**

93 **Table S1, related to Figure 4.** Average number of sequence, shape, and overlapping sites  
94 per peak.

95 **Table S2, related to Figures 2 and 4.** Mean information content per position (ICP) of  
96 shape-motifs.

97 **Table S3, related to Figure 4.** Fractions of top peaks that are sequence-only, shape-only,  
98 and co-occurrence. Every cell shows two values in the format  $f_s/f_{sh}/f_{co}$ , where  $f_s$ ,  $f_{sh}$ , and  
99  $f_{co}$  denote the fraction of sequence-only, shape-only, and co-occurrence peaks, respectively.

100 **Table S4, related to Figure 4.** Number of datasets where the highest fraction of peaks is  
101 sequence-only, co-occurrence, or shape-only across different affinity bins

GC% in Positive data for Training

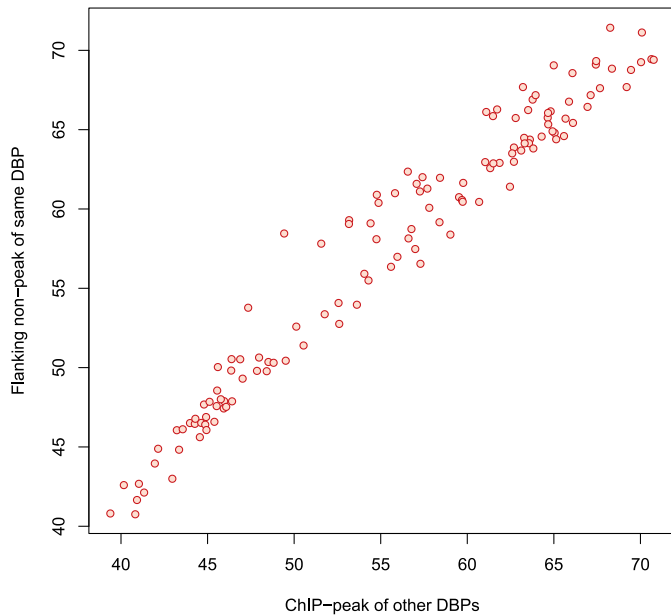

GC% in Control data for Training

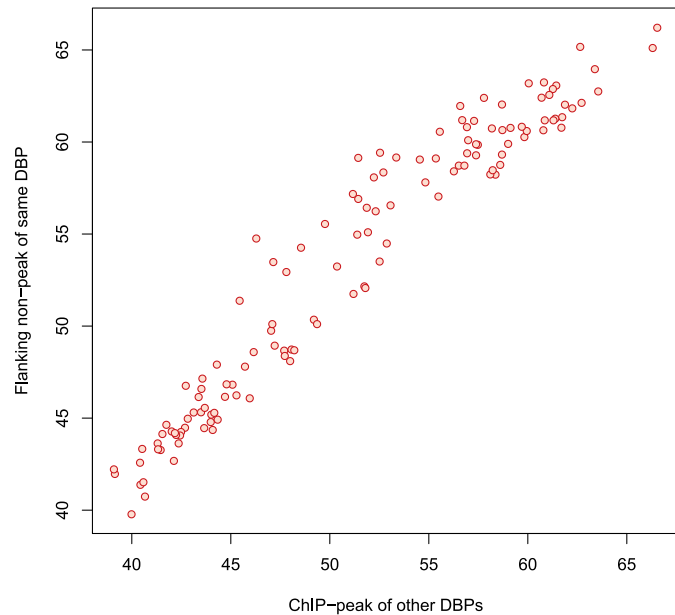

GC% in Positive data for Validation

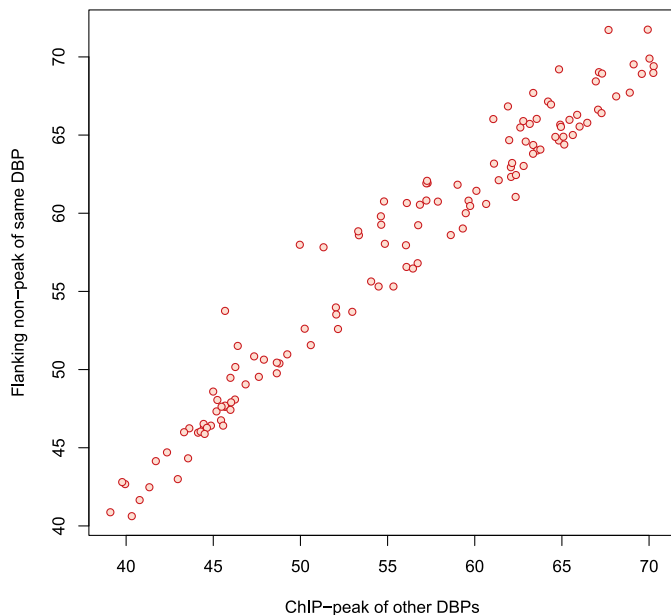

GC% in Control data for Validation

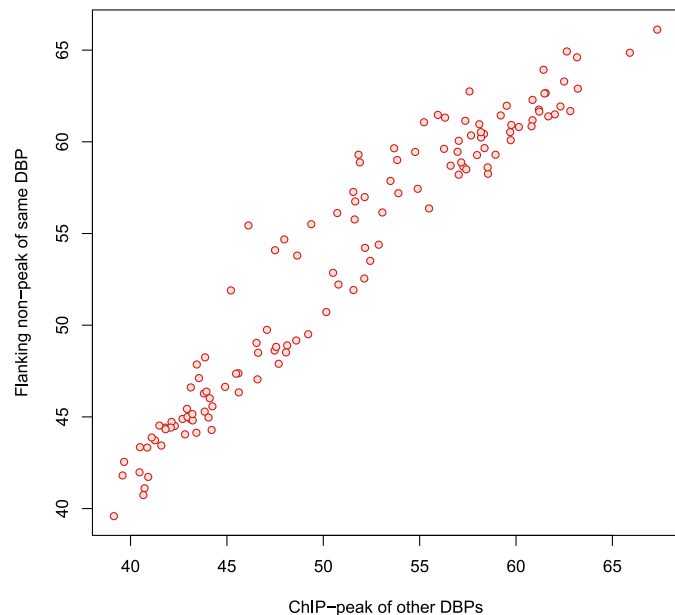

(B)

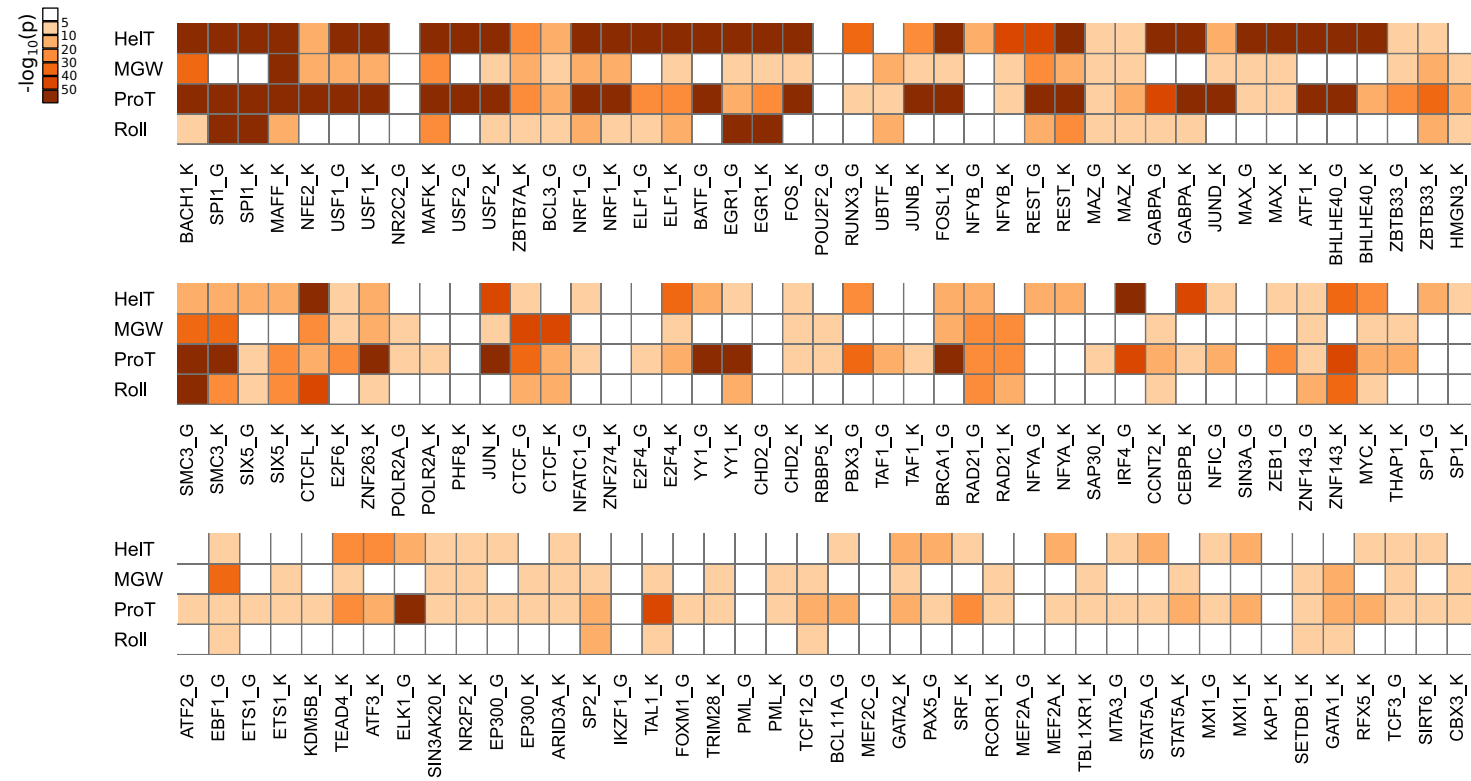

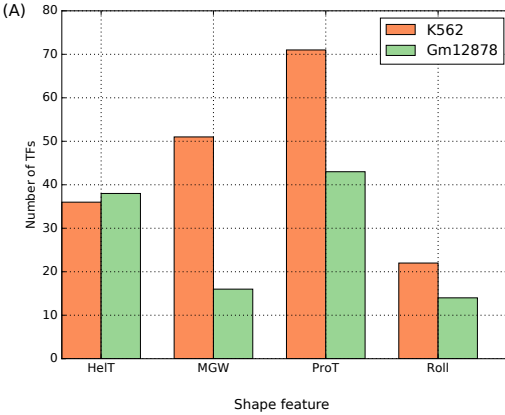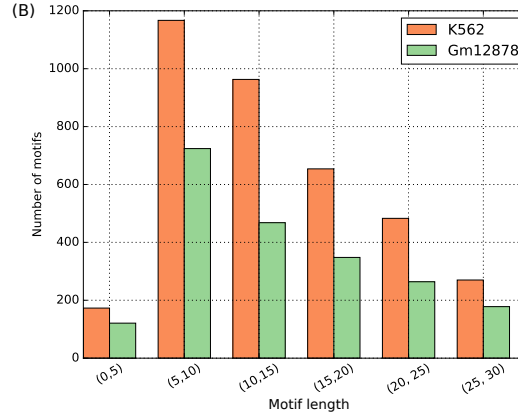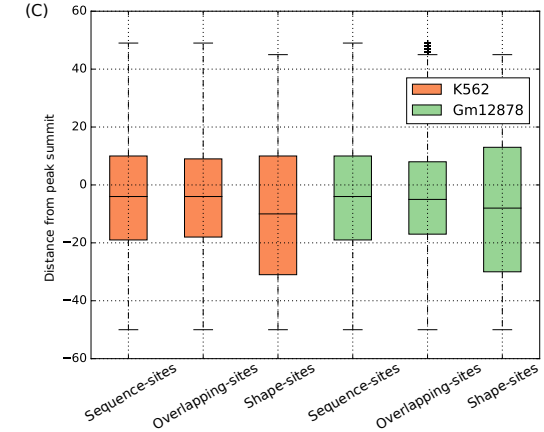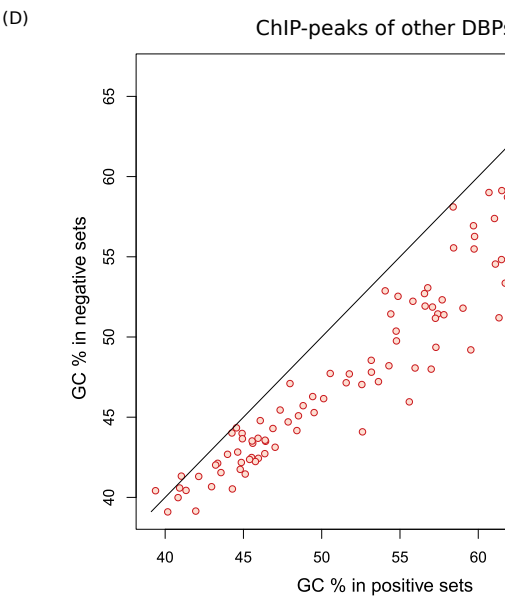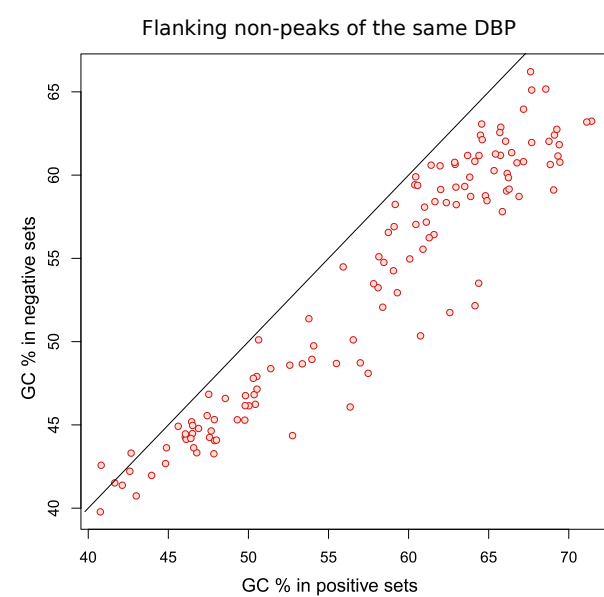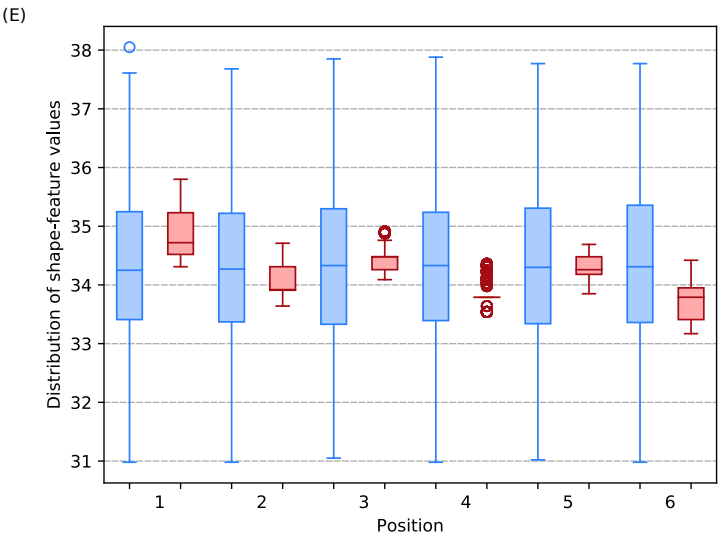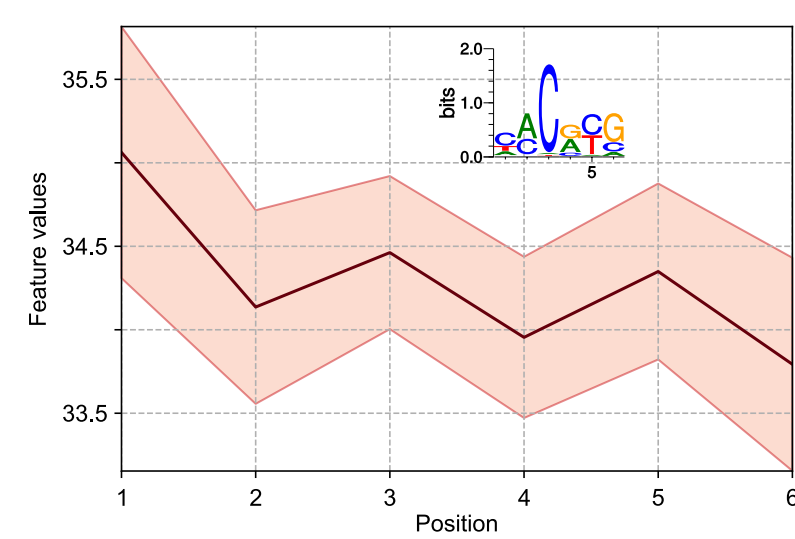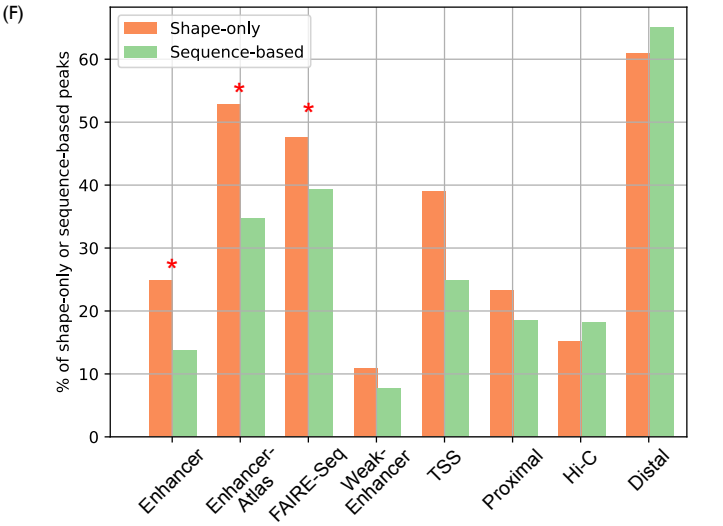

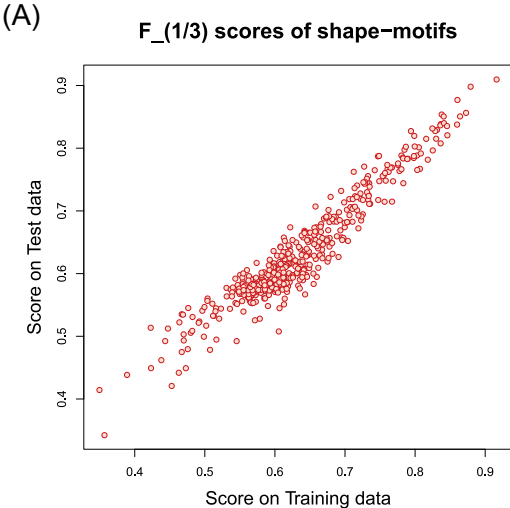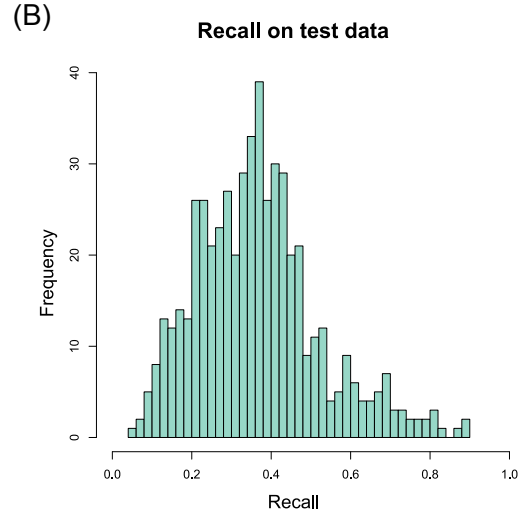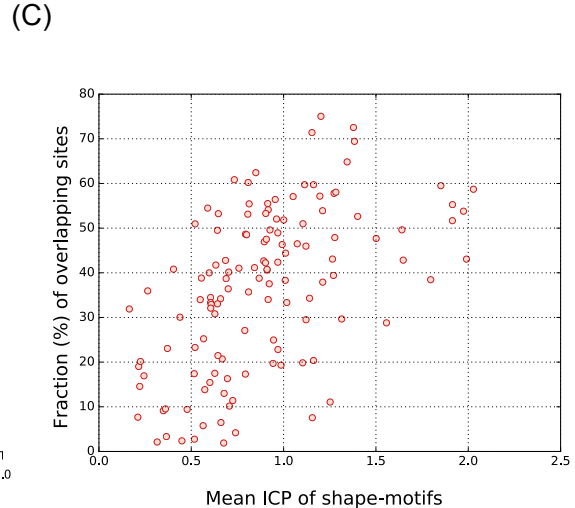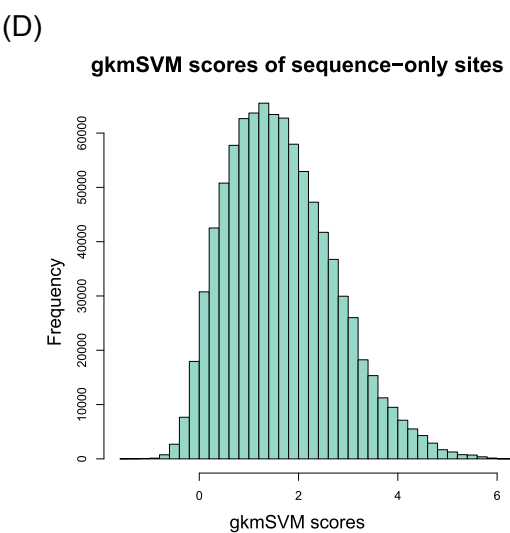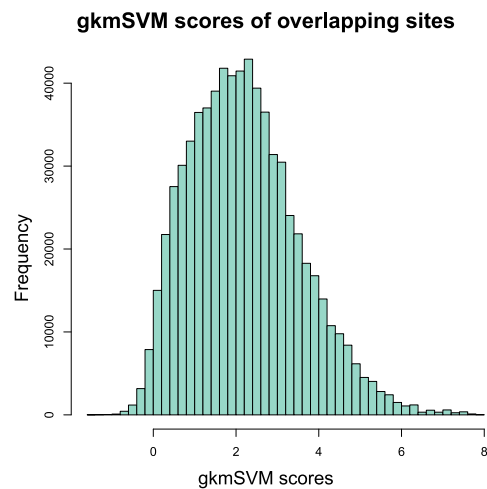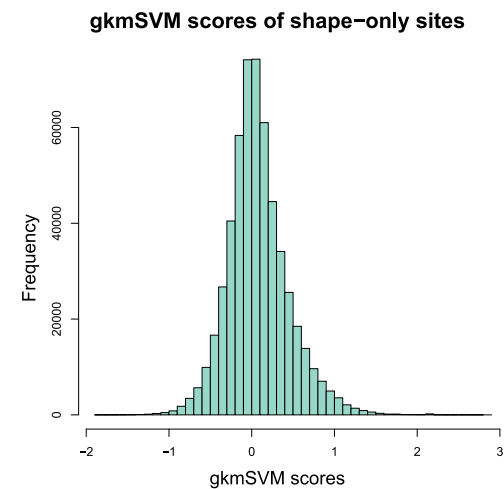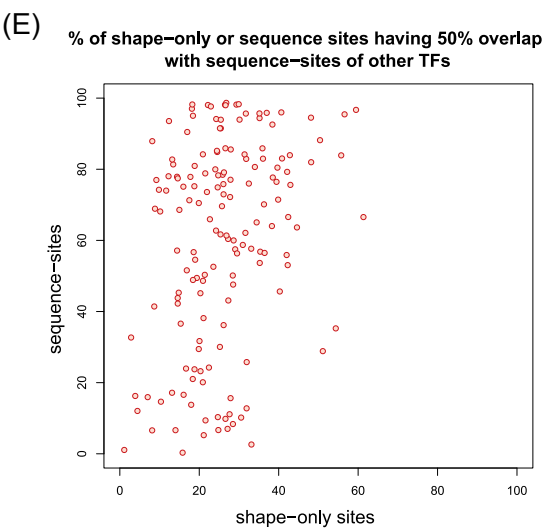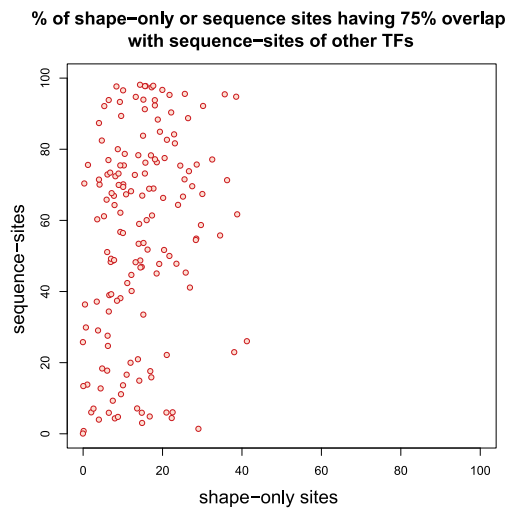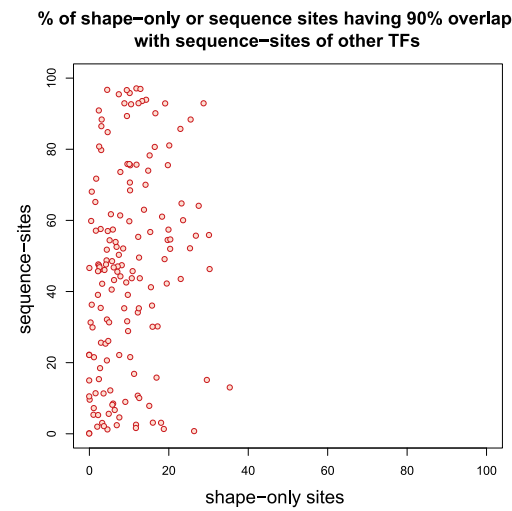

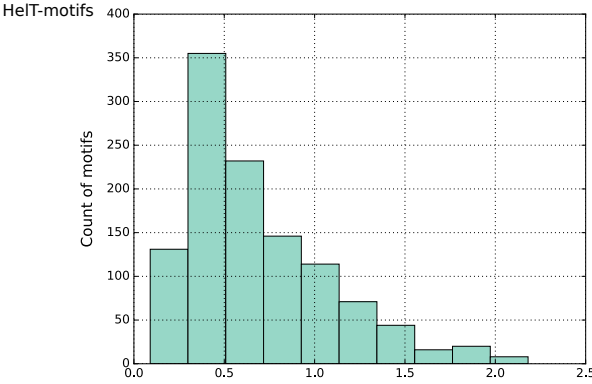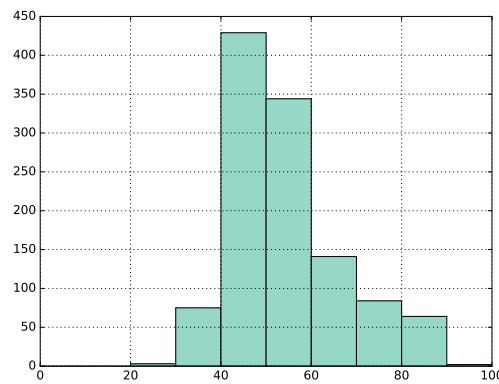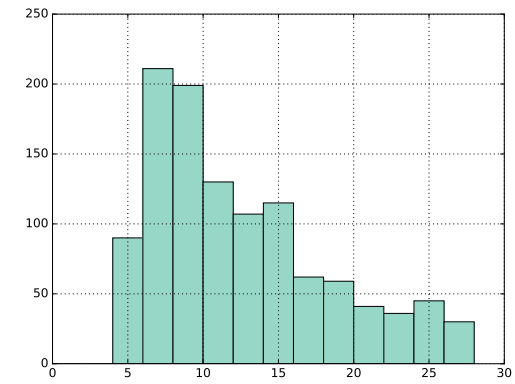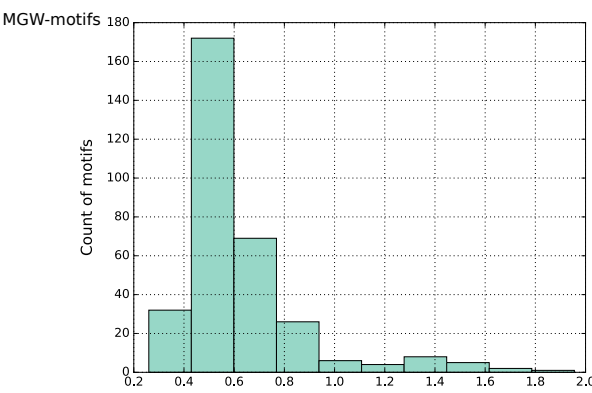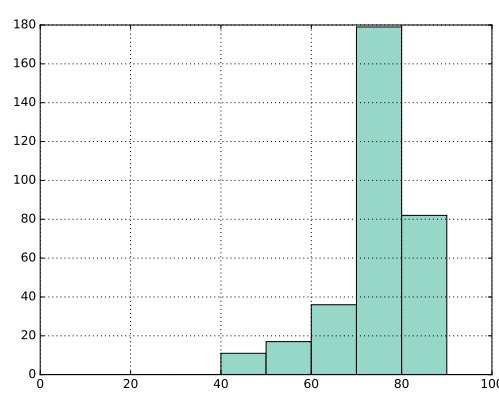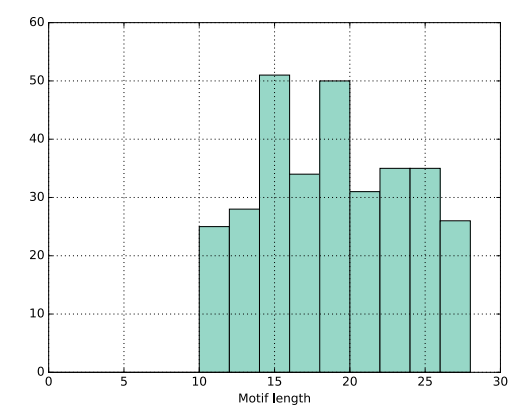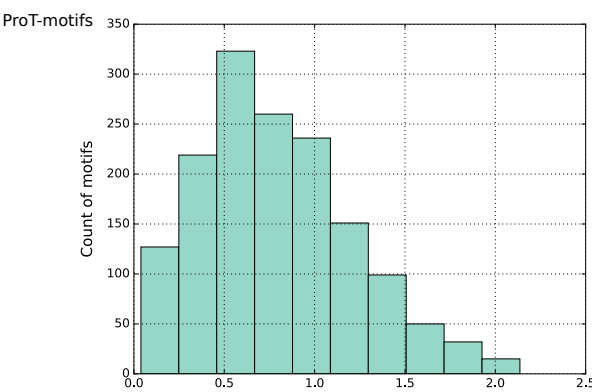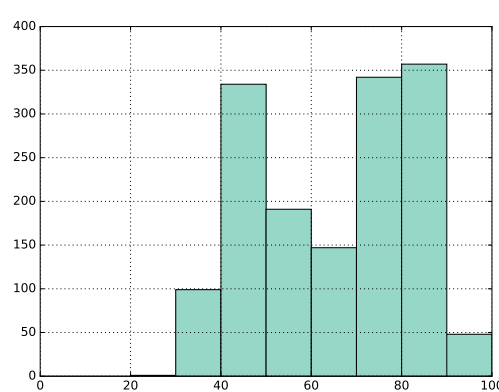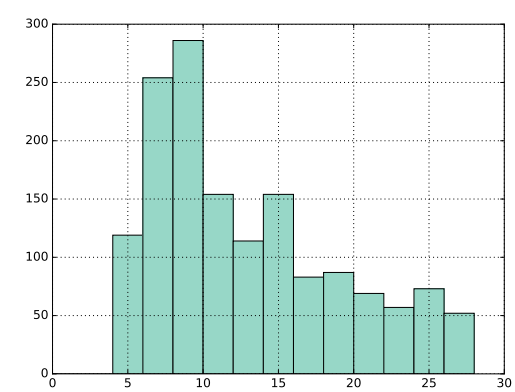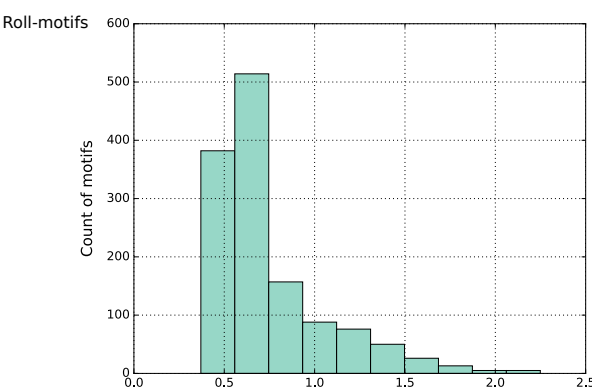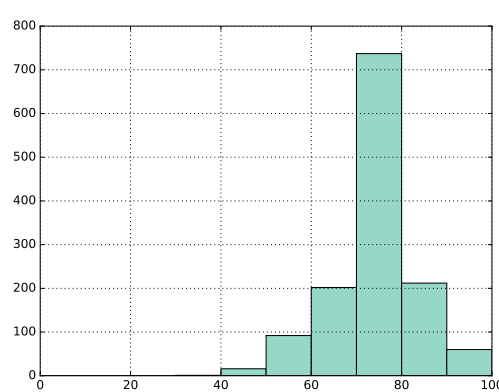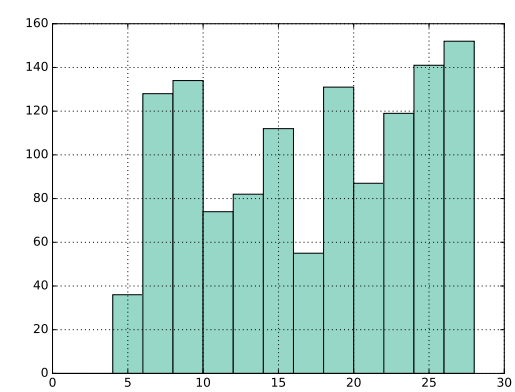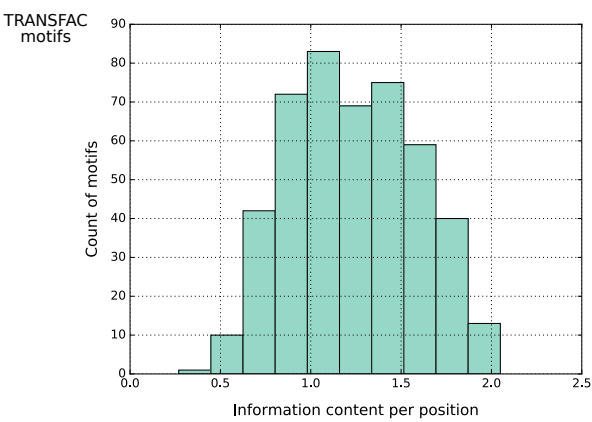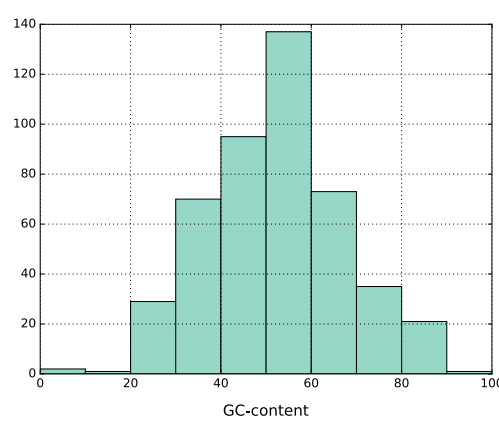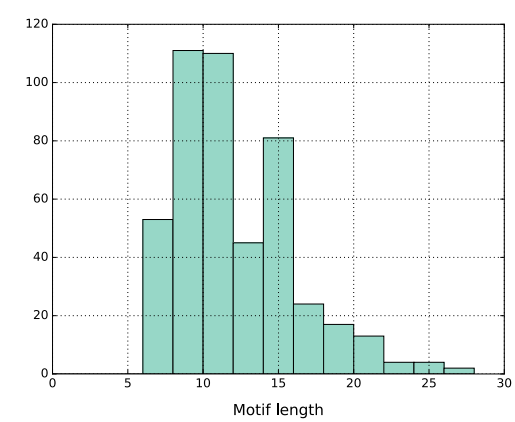





● Shape-only  
● Sequence-only  
● Co-occurrence

Cell-type: K562  
 X-axis: decile of ChIP-peaks computed from ChIP intensity (10 = decile of top 10%, 1 = decile of lowest 10%)  
 Y-axis: fraction (%)

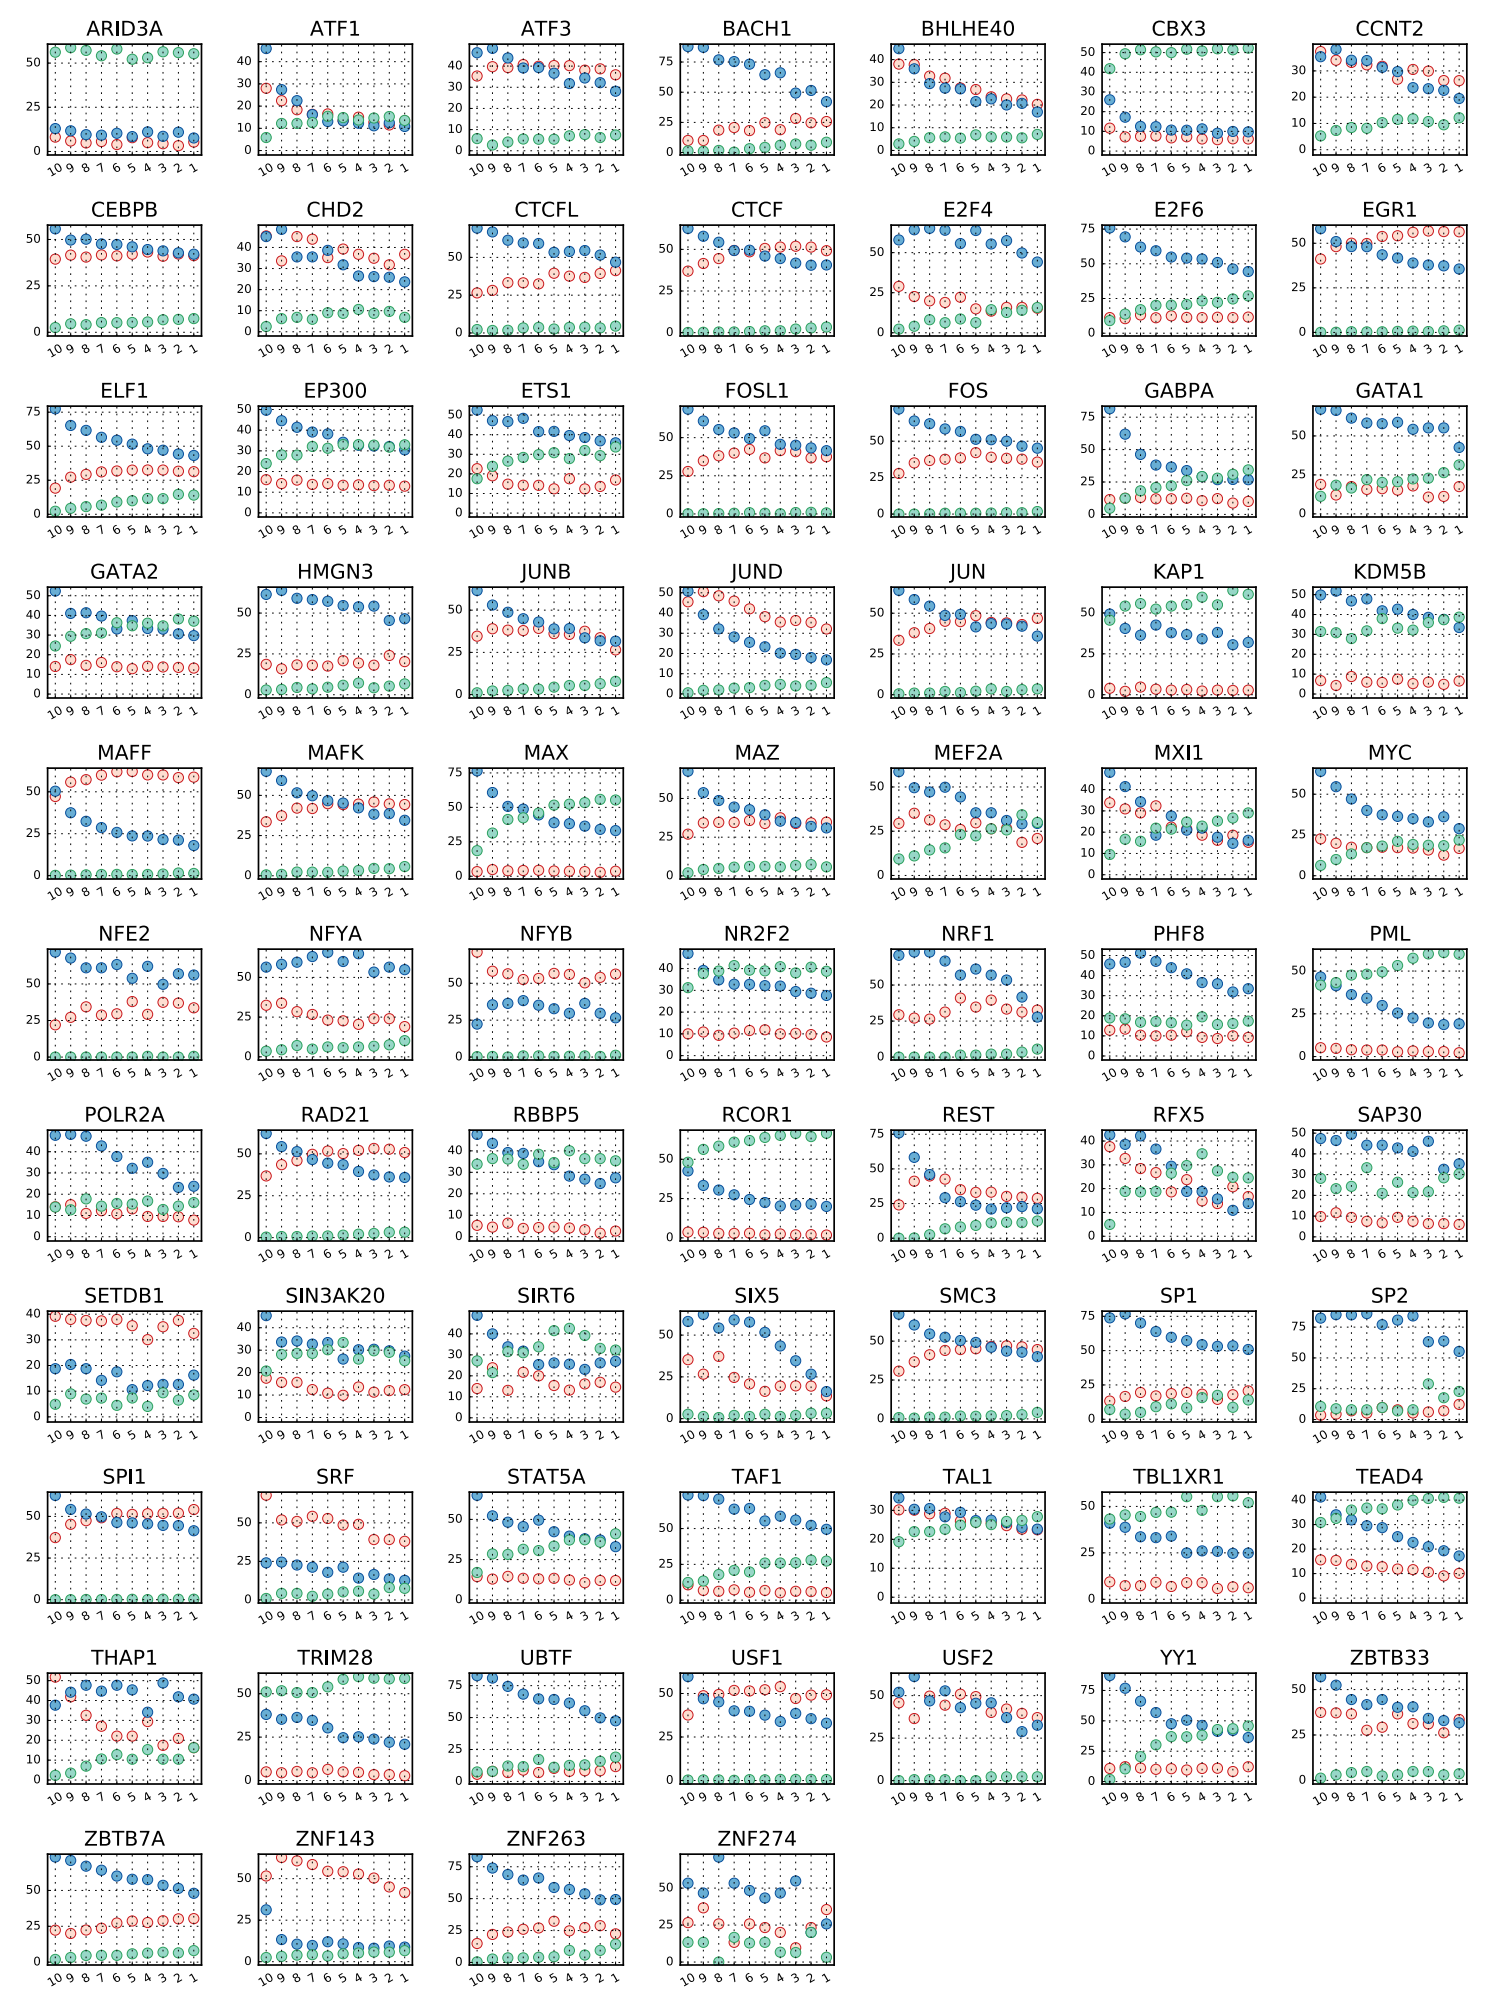

Fraction of shape-only, sequence-only, and co-occurrence peaks in different deciles of CHIP intensity  
 Cell-type: Gm12878  
 X-axis: decile of CHIP-peaks computed from CHIP intensity (10 = decile of top 10%, 1 = decile of lowest 10%)  
 Y-axis: fraction (%)

● Shape-only  
 ● Sequence-only  
 ● Co-occurrence

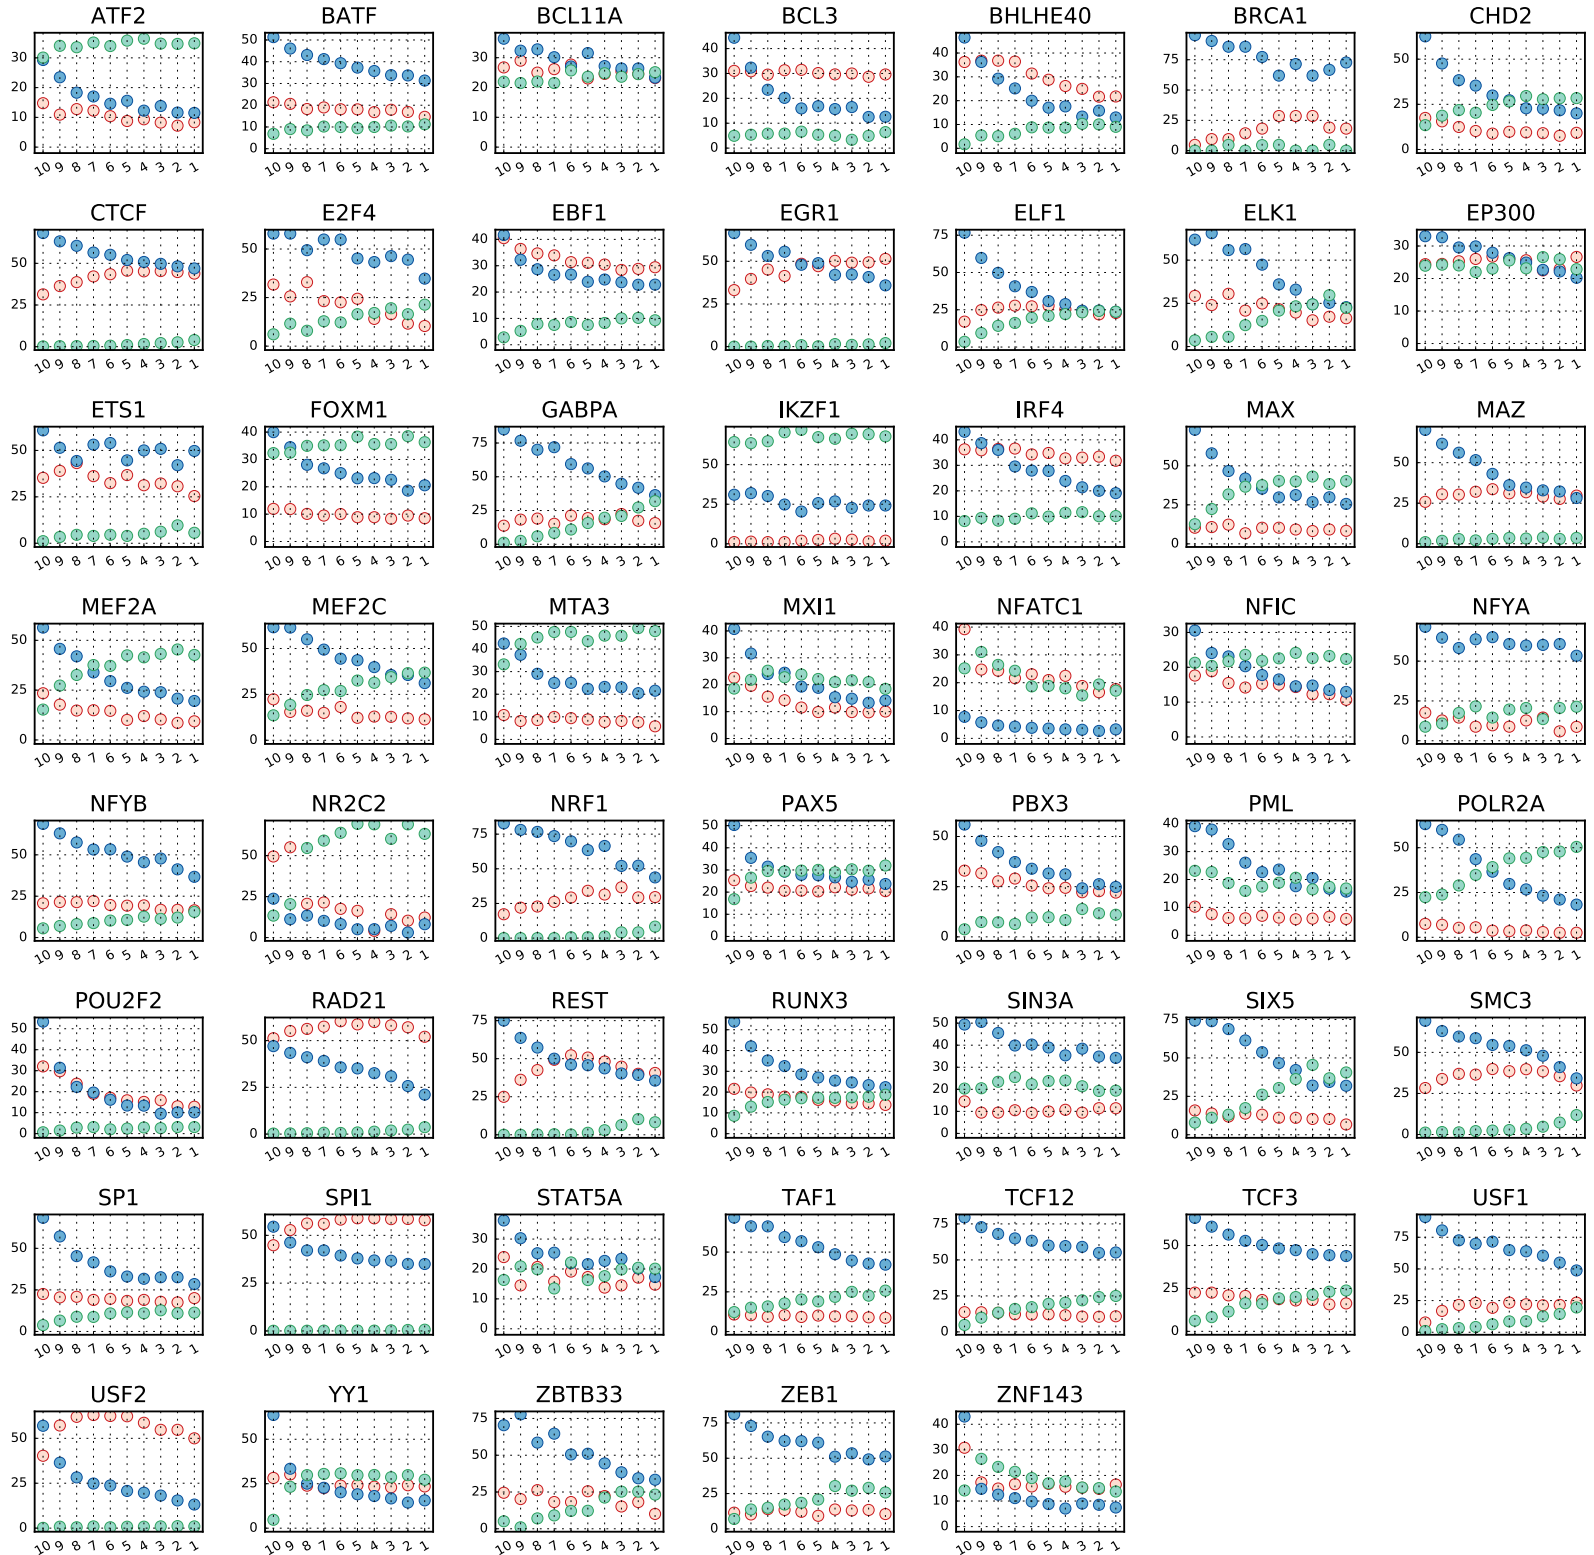

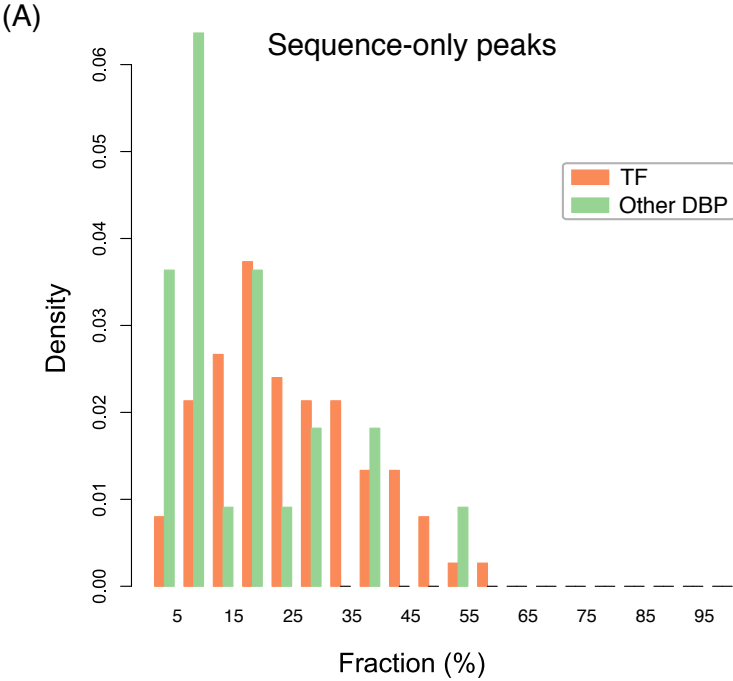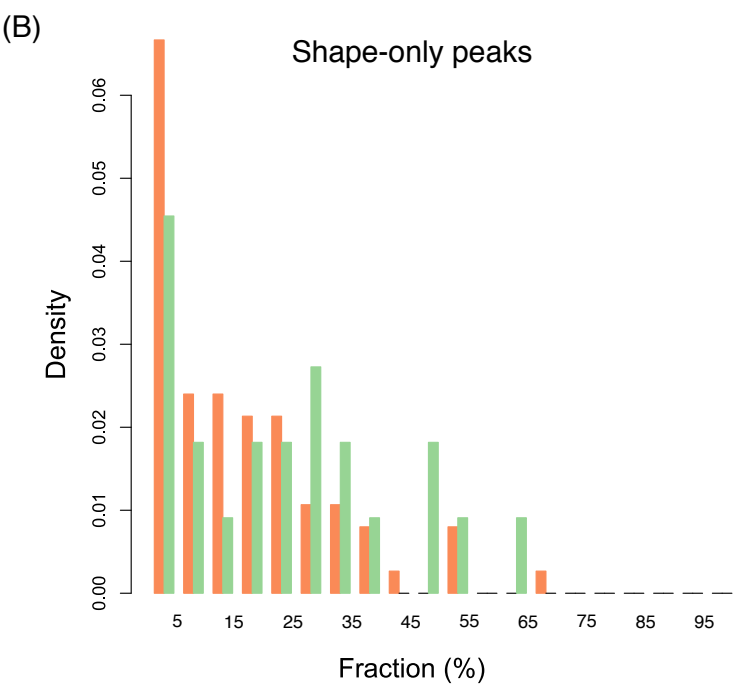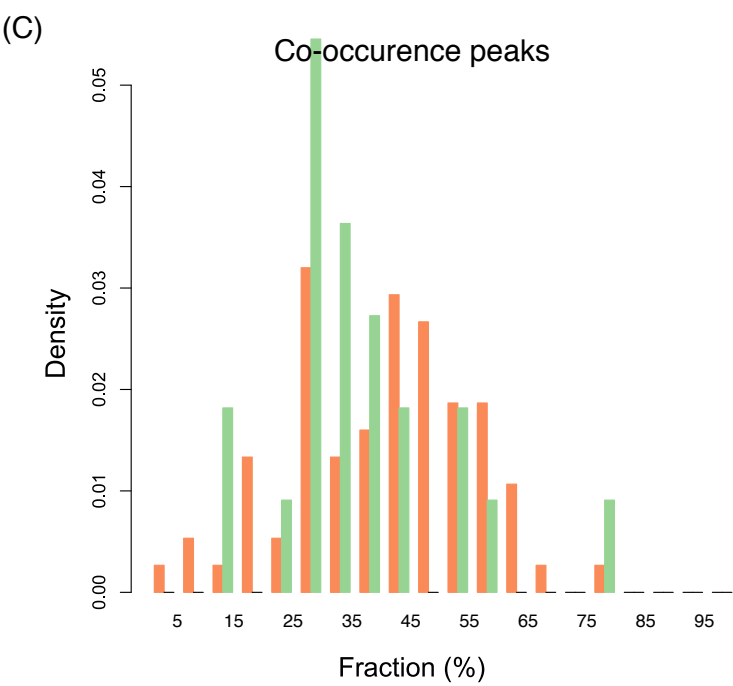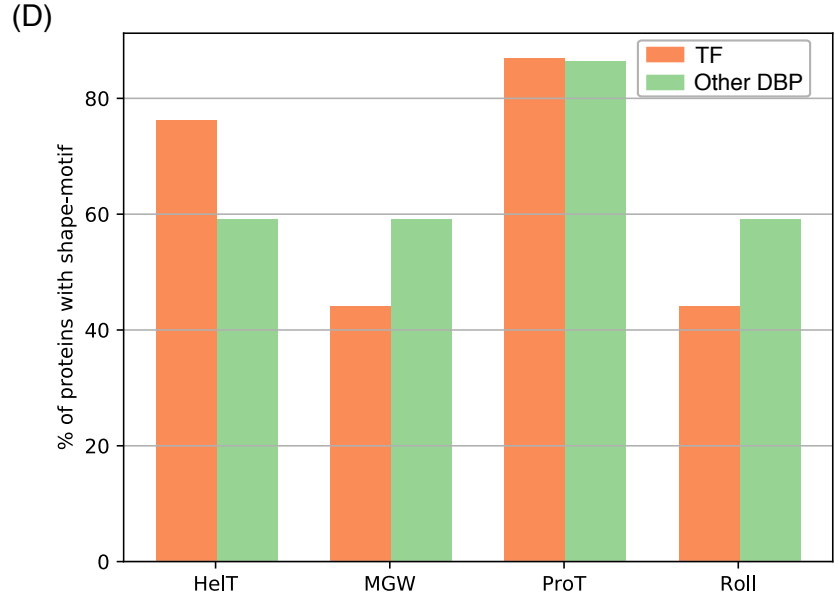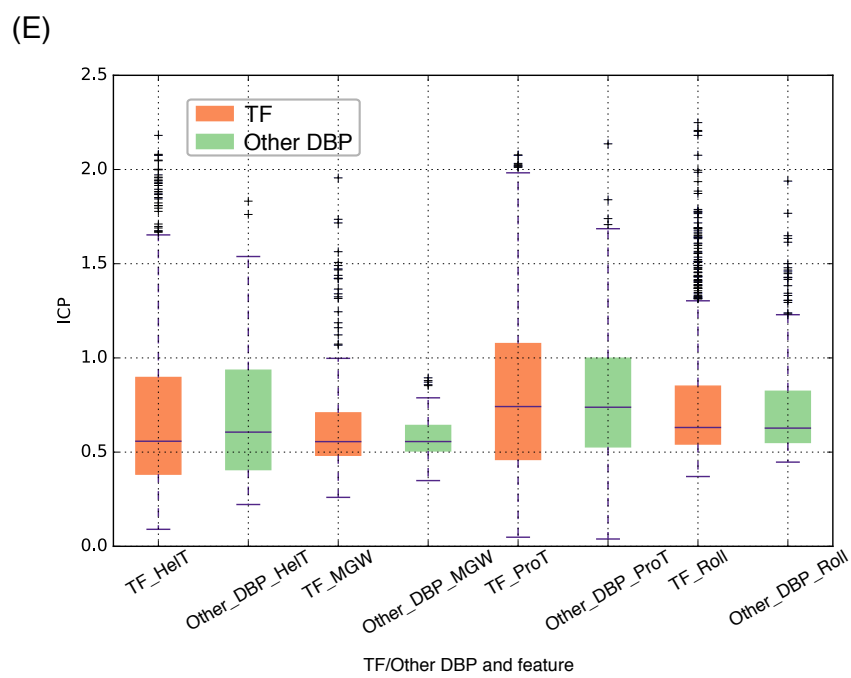

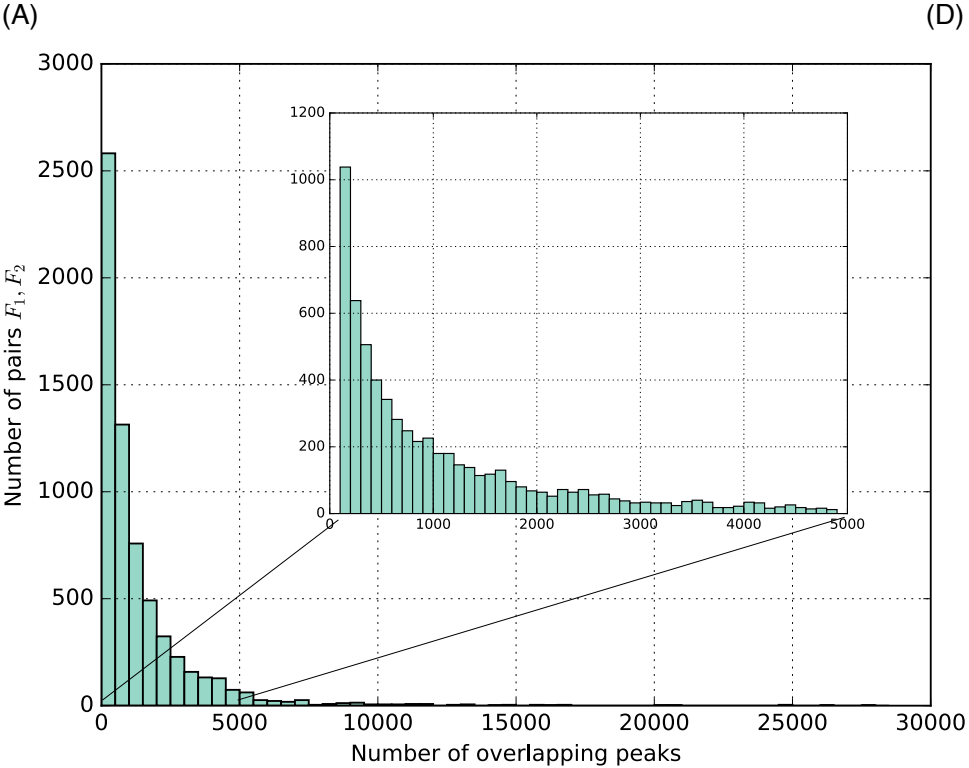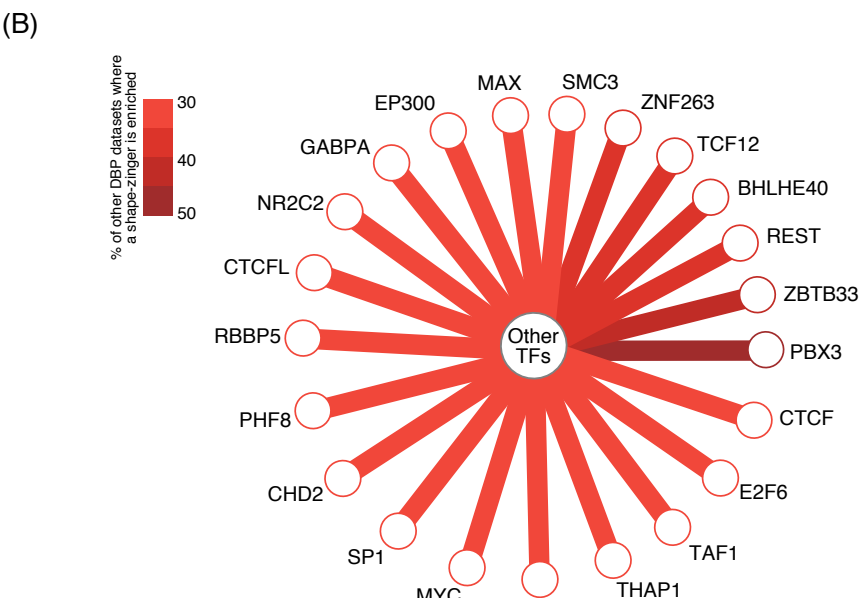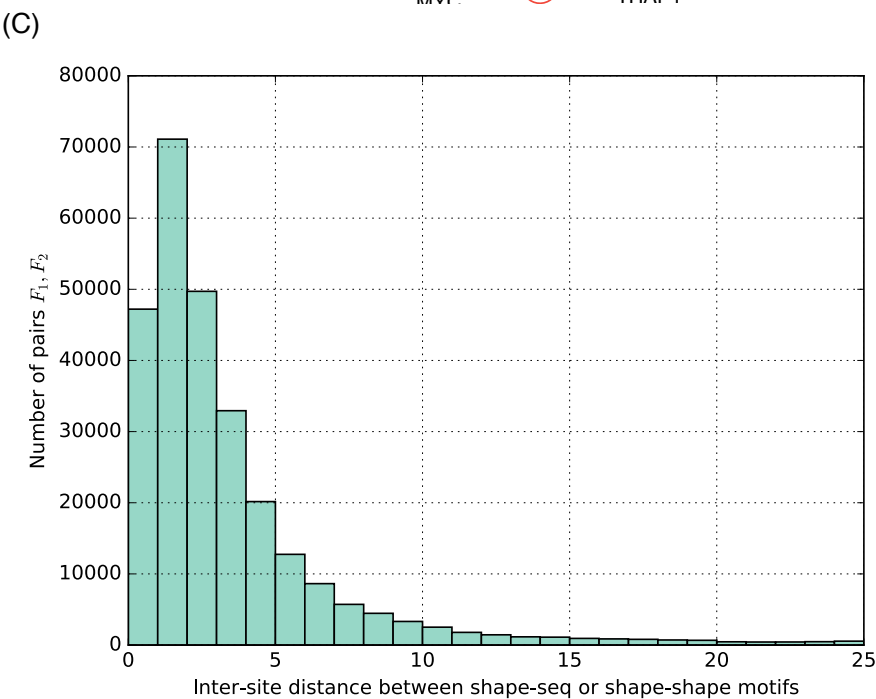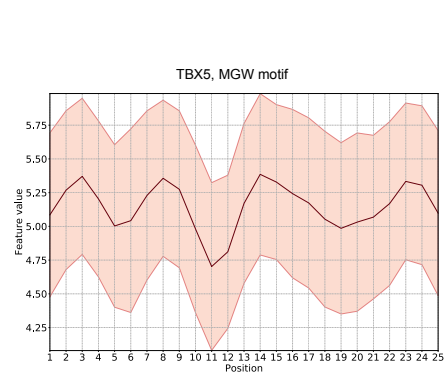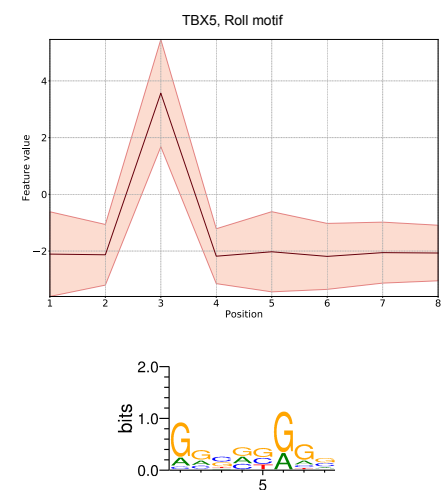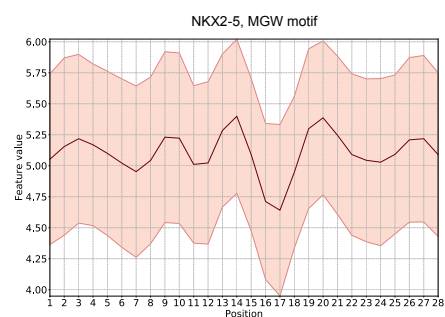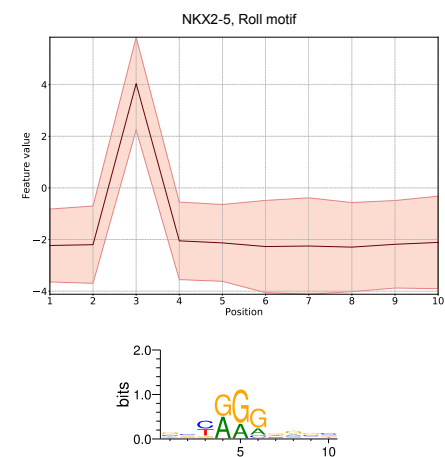

Cell line: K562

log10(shape\_only/seq\_based)

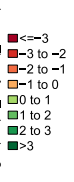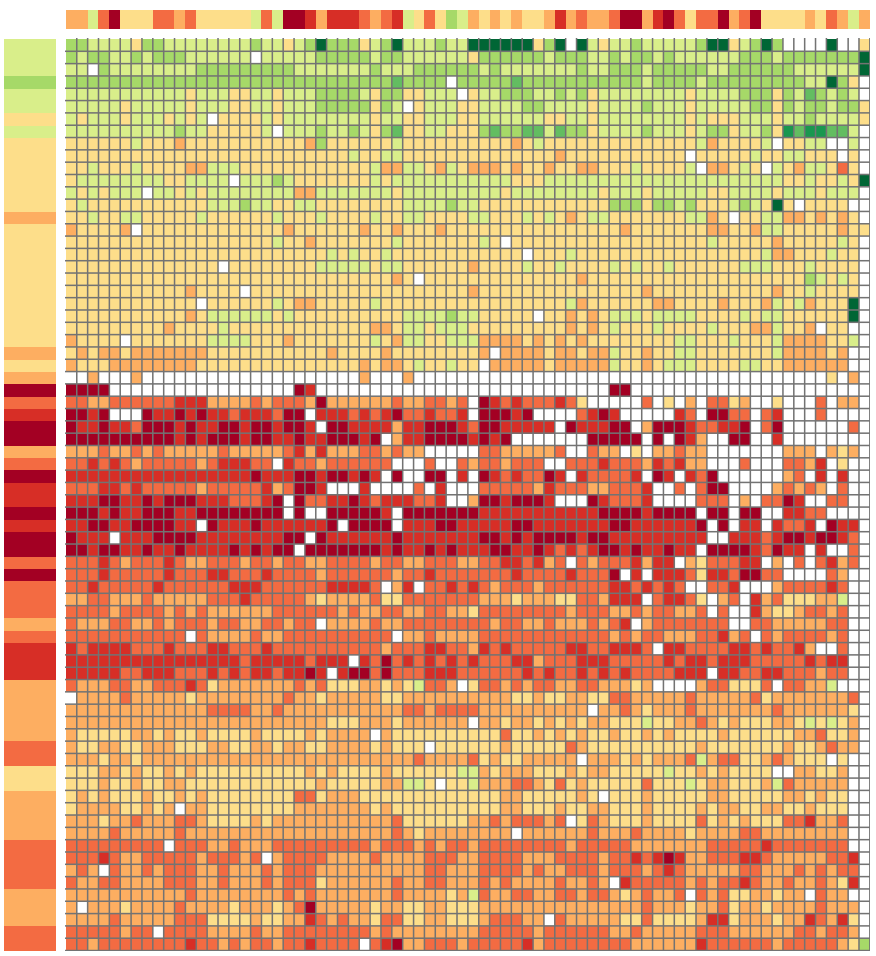

Cell line: Gm12878

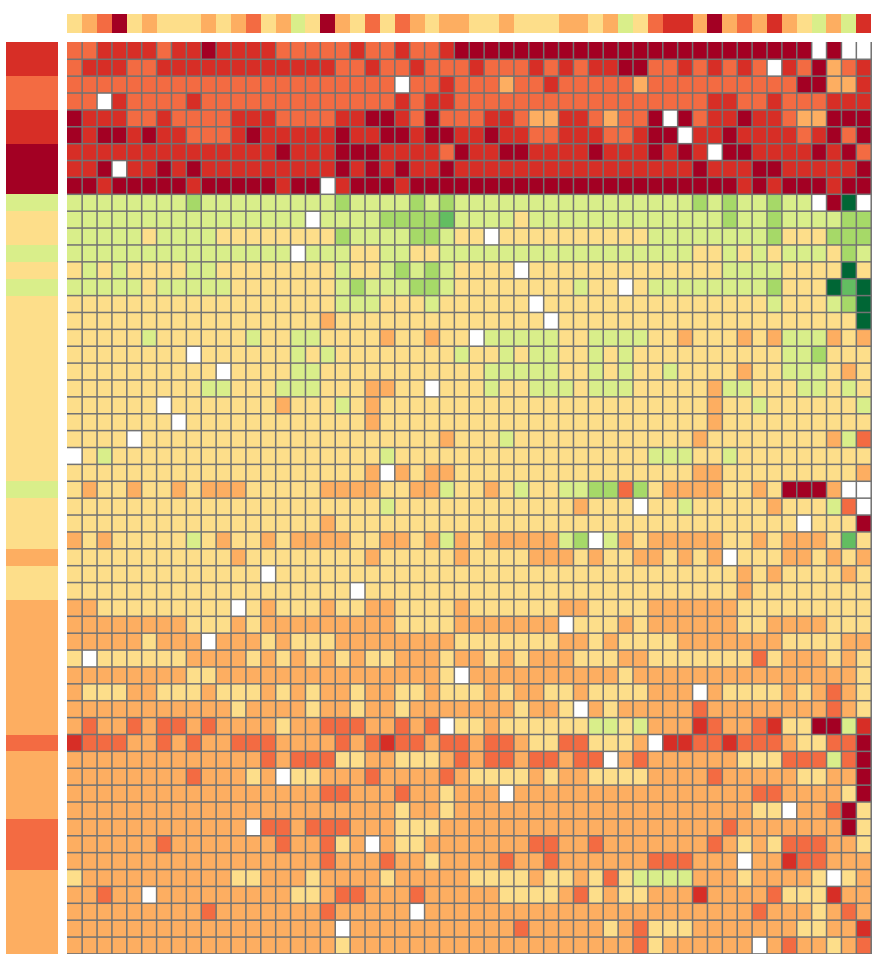

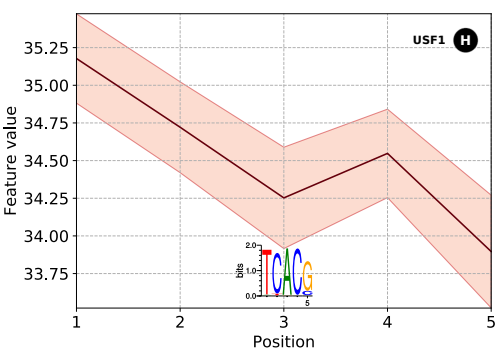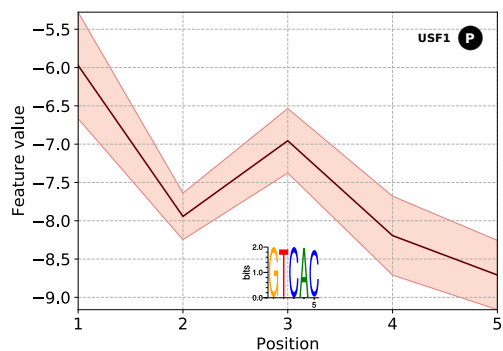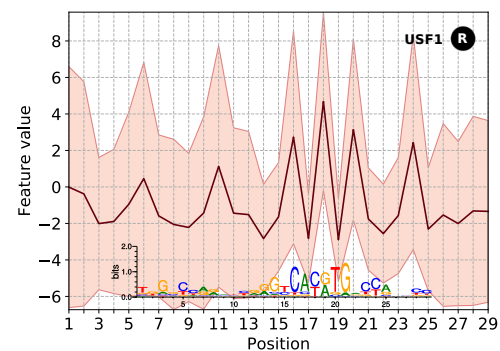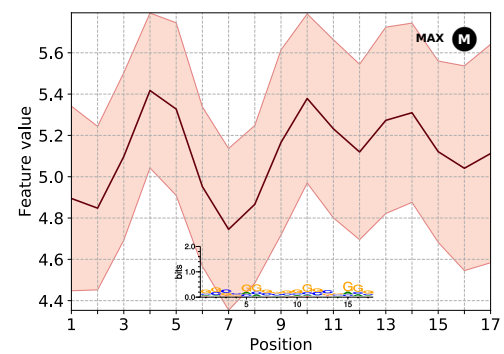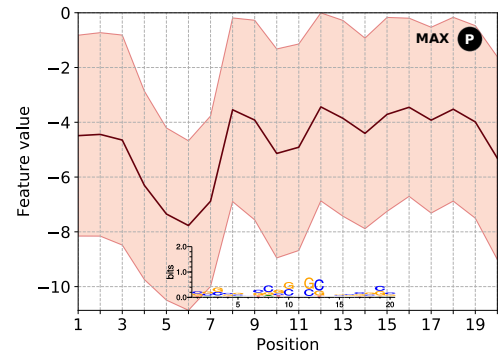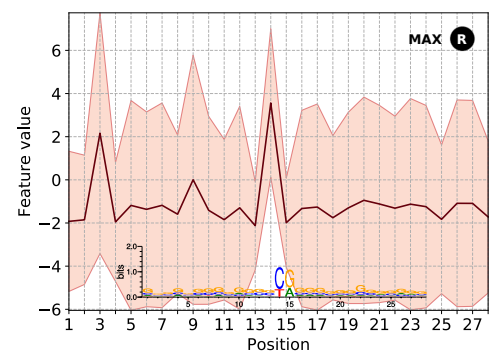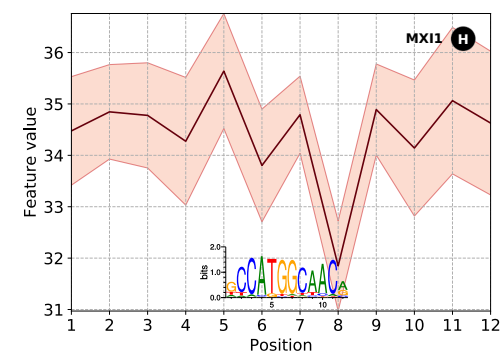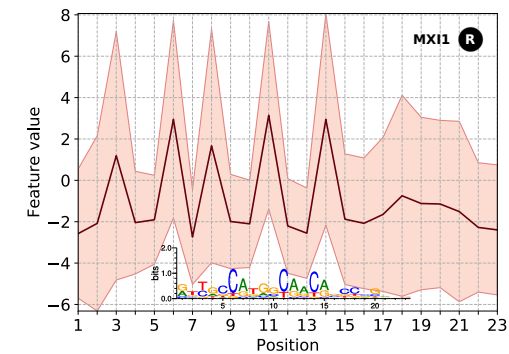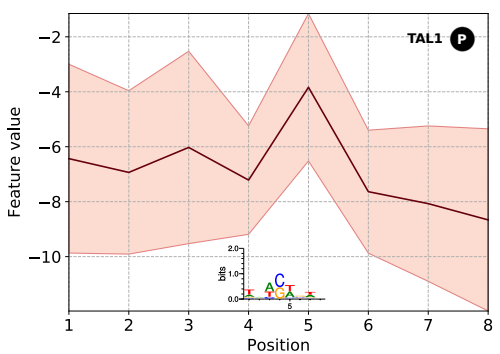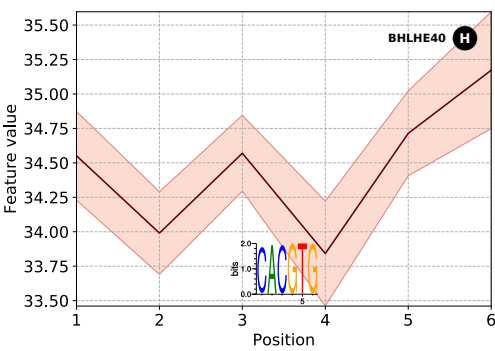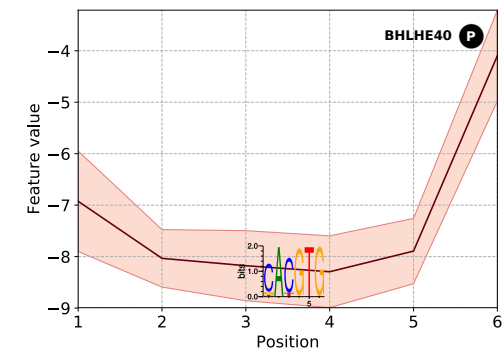

**MITOMI-based ranks of seq-only sites**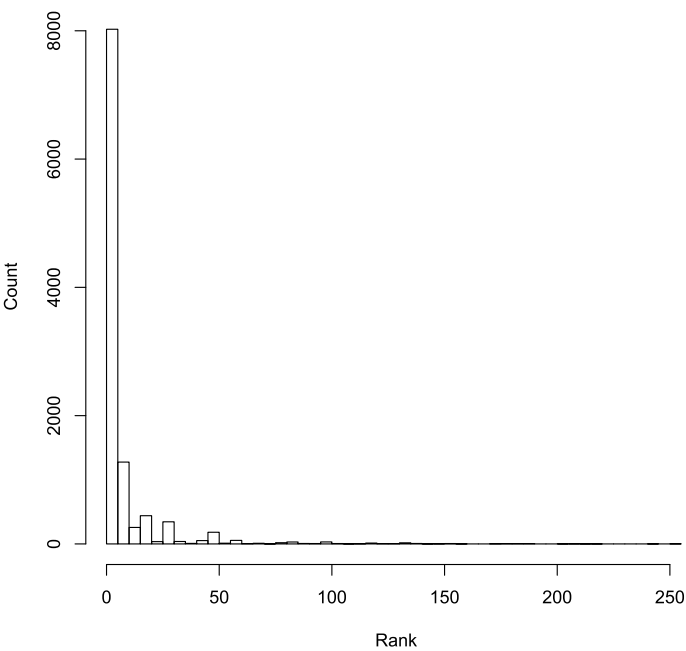**MITOMI-based ranks of overlapping sites**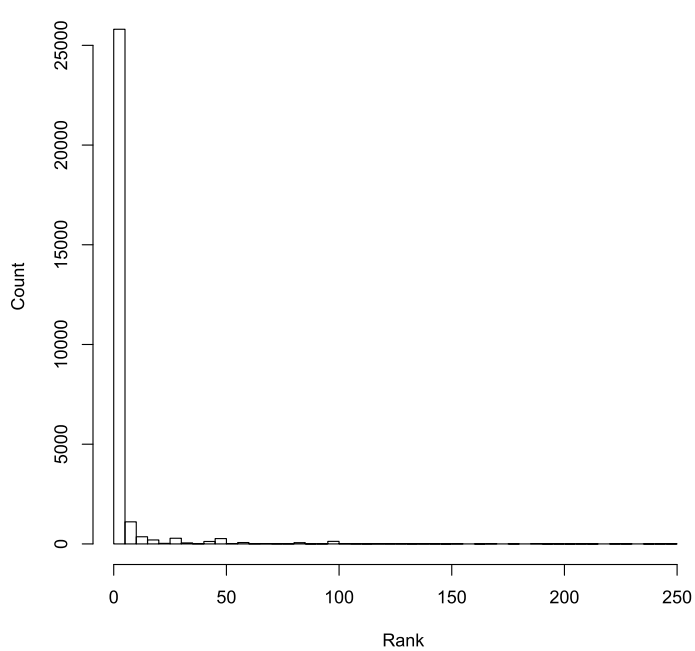**MITOMI-based ranks of HeIT-only sites**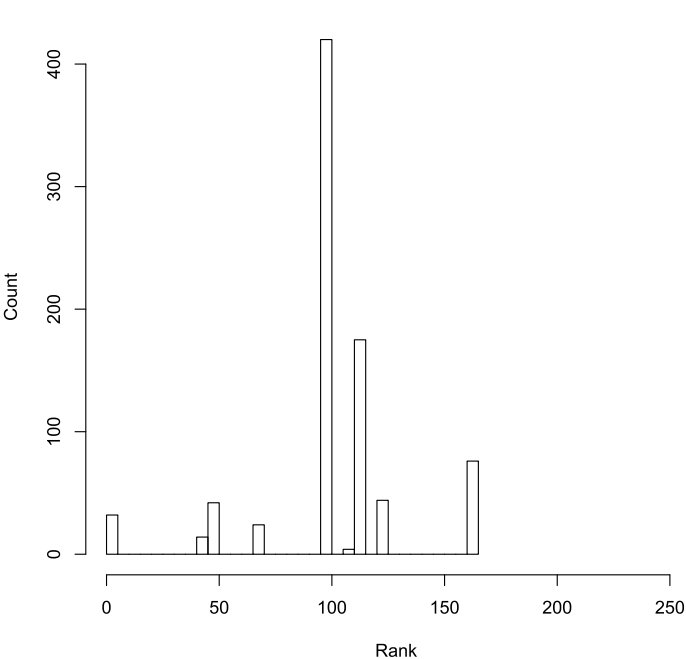**MITOMI-based ranks of MGW-only sites**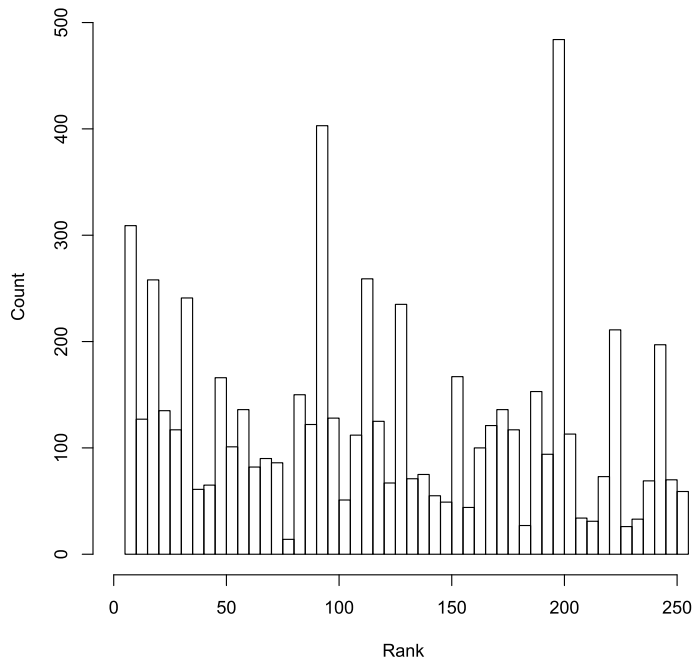**MITOMI-based ranks of ProT-only sites**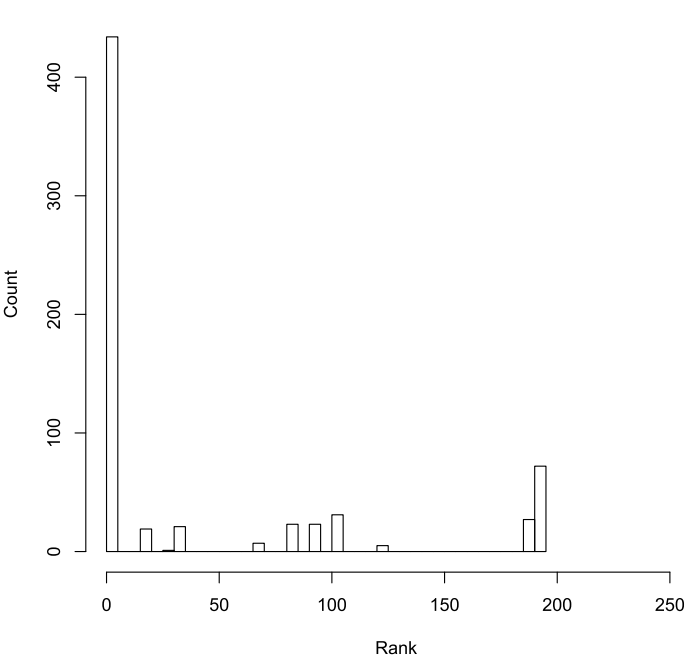**MITOMI-based ranks of Roll-only sites**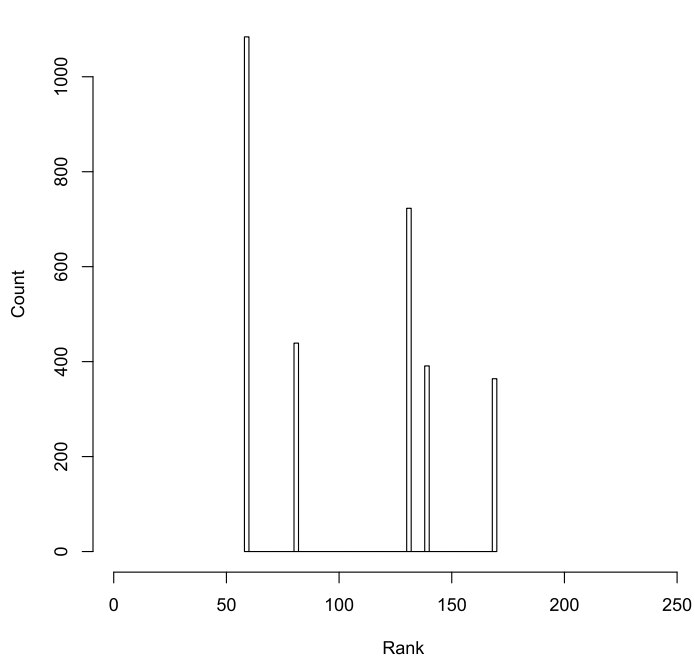

**Supplementary Table 1, related to Figure 4.**  
**Average number of sequence-only, shape-only, and overlapping sites per peak**

| DBP     | Cell line | Sequence-only sites | Shape-only sites | Overlapping-sites |
|---------|-----------|---------------------|------------------|-------------------|
| ARID3A  | K562      | 0.26                | 1.78             | 0.04              |
| ATF1    | K562      | 0.59                | 0.23             | 1.07              |
| ATF2    | Gm12878   | 0.52                | 0.71             | 0.37              |
| ATF3    | K562      | 1.61                | 0.23             | 1.16              |
| BACH1   | K562      | 1.45                | 0.24             | 4.23              |
| BATF    | Gm12878   | 0.47                | 0.20             | 1.53              |
| BCL11A  | Gm12878   | 1.08                | 0.88             | 0.29              |
| BCL3    | Gm12878   | 0.96                | 0.23             | 1.36              |
| BHLHE40 | Gm12878   | 1.12                | 0.16             | 1.27              |
| BHLHE40 | K562      | 1.10                | 0.14             | 1.76              |
| BRCA1   | Gm12878   | 1.84                | 0.20             | 6.12              |
| CBX3    | K562      | 0.32                | 0.99             | 0.08              |
| CCNT2   | K562      | 1.33                | 0.37             | 0.88              |
| CEBPB   | K562      | 2.81                | 0.55             | 1.73              |
| CHD2    | Gm12878   | 0.63                | 1.25             | 0.63              |
| CHD2    | K562      | 1.88                | 0.37             | 1.12              |
| CTCF    | Gm12878   | 4.83                | 0.29             | 3.74              |
| CTCF    | K562      | 4.74                | 0.19             | 3.37              |
| CTCFL   | K562      | 1.86                | 0.40             | 2.23              |
| E2F4    | Gm12878   | 1.78                | 1.17             | 1.88              |
| E2F4    | K562      | 1.66                | 0.79             | 2.17              |
| E2F6    | K562      | 0.92                | 1.61             | 1.31              |
| EBF1    | Gm12878   | 2.27                | 0.23             | 1.68              |
| EGR1    | Gm12878   | 5.85                | 0.14             | 5.74              |
| EGR1    | K562      | 5.72                | 0.13             | 4.43              |
| ELF1    | Gm12878   | 1.79                | 0.81             | 1.58              |
| ELF1    | K562      | 2.53                | 1.02             | 2.65              |
| ELK1    | Gm12878   | 2.27                | 1.05             | 1.66              |
| EP300   | Gm12878   | 0.78                | 1.02             | 0.15              |
| EP300   | K562      | 0.91                | 1.10             | 0.52              |
| ETS1    | Gm12878   | 2.12                | 0.63             | 1.57              |
| ETS1    | K562      | 0.75                | 1.69             | 0.48              |
| FOS     | K562      | 2.68                | 0.05             | 3.64              |
| FOSL1   | K562      | 2.33                | 0.03             | 3.24              |
| FOXM1   | Gm12878   | 0.40                | 1.04             | 0.29              |
| GABPA   | Gm12878   | 1.48                | 1.18             | 2.51              |
| GABPA   | K562      | 0.76                | 1.59             | 1.63              |
| GATA1   | K562      | 3.14                | 1.54             | 1.38              |
| GATA2   | K562      | 1.27                | 1.37             | 0.55              |
| HMG3    | K562      | 1.54                | 0.35             | 2.93              |
| IKZF1   | Gm12878   | 0.31                | 3.58             | 0.09              |
| IRF4    | Gm12878   | 1.39                | 0.30             | 0.71              |
| JUN     | K562      | 3.01                | 0.15             | 2.74              |
| JUNB    | K562      | 2.83                | 0.17             | 2.75              |
| JUND    | K562      | 2.41                | 0.09             | 1.55              |



| DBP      | Cell line | Sequence-only sites | Shape-only sites | Overlapping-sites |
|----------|-----------|---------------------|------------------|-------------------|
| KAP1     | K562      | 0.58                | 3.89             | 0.15              |
| KDM5B    | K562      | 0.66                | 1.57             | 1.17              |
| MAFF     | K562      | 2.64                | 0.03             | 1.67              |
| MAFK     | K562      | 2.82                | 0.21             | 3.36              |
| MAX      | Gm12878   | 0.85                | 1.71             | 1.34              |
| MAX      | K562      | 0.53                | 3.33             | 1.61              |
| MAZ      | Gm12878   | 2.30                | 0.19             | 3.11              |
| MAZ      | K562      | 1.91                | 0.33             | 2.12              |
| MEF2A    | Gm12878   | 1.48                | 1.54             | 0.30              |
| MEF2A    | K562      | 3.23                | 1.08             | 0.19              |
| MEF2C    | Gm12878   | 1.52                | 1.73             | 0.34              |
| MTA3     | Gm12878   | 0.47                | 1.57             | 0.33              |
| MXI1     | Gm12878   | 0.45                | 1.01             | 0.31              |
| MXI1     | K562      | 1.11                | 0.63             | 0.82              |
| MYC      | K562      | 0.78                | 0.80             | 1.64              |
| NFATC1   | Gm12878   | 0.69                | 1.11             | 0.03              |
| NFE2     | K562      | 1.78                | 0.02             | 4.75              |
| NFIC     | Gm12878   | 0.42                | 0.57             | 0.42              |
| NFYA     | Gm12878   | 1.78                | 1.32             | 3.53              |
| NFYA     | K562      | 3.33                | 0.39             | 4.01              |
| NFYB     | Gm12878   | 1.28                | 0.77             | 2.72              |
| NFYB     | K562      | 4.10                | 0.02             | 1.67              |
| NR2C2    | Gm12878   | 1.85                | 4.17             | 0.17              |
| NR2F2    | K562      | 1.05                | 1.34             | 0.72              |
| NRF1     | Gm12878   | 4.35                | 0.36             | 6.99              |
| NRF1     | K562      | 4.57                | 0.29             | 7.21              |
| PAX5     | Gm12878   | 1.13                | 0.84             | 0.54              |
| PBX3     | Gm12878   | 1.00                | 0.25             | 1.07              |
| PHF8     | K562      | 0.54                | 0.77             | 0.97              |
| PML      | Gm12878   | 0.34                | 0.82             | 0.52              |
| PML      | K562      | 0.48                | 2.19             | 0.63              |
| POLR2A   | Gm12878   | 0.49                | 1.56             | 1.01              |
| POLR2A   | K562      | 0.62                | 0.69             | 1.36              |
| POU2F2   | Gm12878   | 1.06                | 0.04             | 1.61              |
| RAD21    | Gm12878   | 2.59                | 0.10             | 1.50              |
| RAD21    | K562      | 2.37                | 0.17             | 1.75              |
| RBBP5    | K562      | 0.36                | 1.49             | 0.69              |
| RCOR1    | K562      | 0.36                | 2.55             | 0.20              |
| REST     | Gm12878   | 3.24                | 0.23             | 2.77              |
| REST     | K562      | 2.03                | 0.27             | 1.69              |
| RFX5     | K562      | 1.35                | 0.62             | 0.36              |
| RUNX3    | Gm12878   | 0.63                | 0.42             | 1.23              |
| SAP30    | K562      | 0.43                | 1.30             | 0.85              |
| SETDB1   | K562      | 0.79                | 0.13             | 0.23              |
| SIN3A    | Gm12878   | 0.50                | 1.06             | 0.74              |
| SIN3AK20 | K562      | 0.49                | 1.51             | 0.42              |
| SIRT6    | K562      | 0.78                | 1.33             | 0.53              |
| SIX5     | Gm12878   | 1.45                | 2.03             | 2.20              |

| DBP     | Cell line | Sequence-only sites | Shape-only sites | Overlapping-sites |
|---------|-----------|---------------------|------------------|-------------------|
| SIX5    | K562      | 1.66                | 0.05             | 3.15              |
| SMC3    | Gm12878   | 1.95                | 0.33             | 2.06              |
| SMC3    | K562      | 2.31                | 0.20             | 2.16              |
| SP1     | Gm12878   | 1.75                | 0.52             | 2.83              |
| SP1     | K562      | 2.99                | 1.00             | 4.33              |
| SP2     | K562      | 1.37                | 1.70             | 4.66              |
| SPI1    | Gm12878   | 3.71                | 0.06             | 2.82              |
| SPI1    | K562      | 3.78                | 0.03             | 4.07              |
| SRF     | K562      | 7.67                | 0.12             | 1.93              |
| STAT5A  | Gm12878   | 1.13                | 0.50             | 1.59              |
| STAT5A  | K562      | 1.99                | 1.75             | 0.64              |
| TAF1    | Gm12878   | 1.08                | 1.18             | 1.36              |
| TAF1    | K562      | 0.89                | 1.46             | 1.64              |
| TAL1    | K562      | 1.81                | 0.76             | 0.21              |
| TBL1XR1 | K562      | 0.82                | 2.62             | 0.36              |
| TCF12   | Gm12878   | 1.51                | 1.49             | 2.07              |
| TCF3    | Gm12878   | 1.10                | 1.38             | 1.39              |
| TEAD4   | K562      | 0.85                | 1.08             | 0.46              |
| THAP1   | K562      | 1.26                | 0.49             | 1.25              |
| TRIM28  | K562      | 0.57                | 2.28             | 0.32              |
| UBTF    | K562      | 1.06                | 0.83             | 3.13              |
| USF1    | Gm12878   | 1.83                | 0.99             | 3.89              |
| USF1    | K562      | 2.47                | 0.03             | 2.90              |
| USF2    | Gm12878   | 3.07                | 0.02             | 2.34              |
| USF2    | K562      | 3.29                | 0.09             | 4.17              |
| YY1     | Gm12878   | 1.85                | 1.05             | 0.74              |
| YY1     | K562      | 2.68                | 2.52             | 1.73              |
| ZBTB33  | Gm12878   | 2.02                | 0.71             | 3.27              |
| ZBTB33  | K562      | 2.31                | 0.19             | 1.62              |
| ZBTB7A  | K562      | 1.39                | 0.60             | 2.35              |
| ZEB1    | Gm12878   | 1.84                | 2.06             | 2.60              |
| ZNF143  | Gm12878   | 0.58                | 0.55             | 0.14              |
| ZNF143  | K562      | 1.34                | 0.12             | 0.18              |
| ZNF263  | K562      | 4.79                | 0.33             | 5.80              |
| ZNF274  | K562      | 1.29                | 0.27             | 1.42              |

**Supplementary Table 2, related to Figures 2 and 4.**  
**Mean information content per position of shape motifs**

| DBP     | Cell line | HelT | MGW  | ProT | Roll |
|---------|-----------|------|------|------|------|
| ATF1    | K562      | 0.38 |      | 0.44 |      |
| ATF2    | Gm12878   | 0.45 |      | 0.46 |      |
| ATF3    | K562      | 0.47 |      | 0.58 |      |
| BACH1   | K562      | 0.70 | 1.27 | 0.79 | 0.58 |
| BATF    | Gm12878   | 0.72 |      | 0.74 |      |
| BCL11A  | Gm12878   | 0.41 |      | 0.61 |      |
| BCL3    | Gm12878   | 1.02 |      | 0.84 | 0.76 |
| BHLHE40 | Gm12878   | 0.64 |      | 0.64 |      |
| BHLHE40 | K562      | 0.60 |      | 0.56 |      |
| BRCA1   | Gm12878   | 0.75 | 0.55 | 0.76 |      |
| CBX3    | K562      | 0.58 |      |      |      |
| CCNT2   | K562      |      | 0.73 | 0.73 | 0.92 |
| CEBPB   | K562      | 0.32 |      | 0.10 |      |
| CHD2    | Gm12878   |      | 0.55 | 0.66 | 0.76 |
| CHD2    | K562      | 0.56 | 0.45 | 0.79 | 0.66 |
| CTCF    | Gm12878   | 0.86 | 0.56 | 0.86 | 0.68 |
| CTCF    | K562      | 1.01 | 0.59 | 0.88 | 0.71 |
| CTCF1   | K562      | 0.91 | 0.78 | 0.94 | 0.87 |
| E2F4    | Gm12878   |      | 0.53 | 0.72 |      |
| E2F4    | K562      | 0.89 | 0.75 | 0.98 | 0.77 |
| E2F6    | K562      | 0.49 | 0.57 | 0.95 | 0.81 |
| EBF1    | Gm12878   |      | 0.74 |      | 0.68 |
| EGR1    | Gm12878   | 1.05 | 0.77 | 1.14 | 0.84 |
| EGR1    | K562      | 0.98 | 0.73 | 0.90 | 0.90 |
| ELF1    | Gm12878   | 0.92 | 0.58 | 0.89 | 0.64 |
| ELF1    | K562      | 0.55 | 0.51 | 0.96 | 0.52 |
| ELK1    | Gm12878   |      | 0.50 | 0.68 | 0.47 |
| EP300   | Gm12878   | 0.37 |      | 0.43 |      |
| EP300   | K562      | 0.68 |      | 0.34 |      |
| ETS1    | Gm12878   |      | 0.52 | 0.77 |      |
| ETS1    | K562      | 1.22 | 0.56 | 0.90 | 0.72 |
| FOS     | K562      | 0.57 |      | 1.06 |      |
| FOSL1   | K562      | 0.61 |      | 0.74 |      |
| FOXM1   | Gm12878   | 0.38 |      | 0.18 |      |
| GABPA   | Gm12878   | 0.57 | 0.52 | 1.17 | 0.61 |
| GABPA   | K562      | 0.27 | 0.47 | 0.82 | 0.52 |
| GATA1   | K562      |      |      | 0.61 |      |
| GATA2   | K562      | 1.06 |      | 0.35 |      |
| HMG3    | K562      |      | 0.68 | 0.96 | 0.79 |
| IKZF1   | Gm12878   | 0.48 |      | 0.34 |      |
| IRF4    | Gm12878   | 0.66 |      | 0.71 |      |
| JUN     | K562      | 0.51 |      | 0.54 |      |
| JUNB    | K562      | 0.65 |      | 0.65 |      |
| JUND    | K562      | 0.49 |      | 0.85 |      |
| KAP1    | K562      | 0.50 |      | 0.17 |      |

| DBP      | Cell line | HelT | MGW  | ProT | Roll |
|----------|-----------|------|------|------|------|
| KDM5B    | K562      |      | 0.49 | 0.77 | 0.75 |
| MAFF     | K562      | 0.91 | 1.47 | 0.42 |      |
| MAFK     | K562      | 0.90 | 1.31 | 0.45 | 0.64 |
| MAX      | Gm12878   | 0.67 | 0.52 | 0.89 | 1.13 |
| MAX      | K562      | 0.60 | 0.44 | 0.74 | 0.82 |
| MAZ      | Gm12878   | 1.03 | 0.69 | 1.05 | 0.81 |
| MAZ      | K562      | 1.06 | 0.62 | 0.96 | 0.74 |
| MEF2A    | Gm12878   | 0.51 |      | 0.32 |      |
| MEF2A    | K562      | 0.74 |      |      |      |
| MEF2C    | Gm12878   | 0.41 |      | 0.14 |      |
| MTA3     | Gm12878   | 0.34 |      | 0.43 |      |
| MXI1     | Gm12878   |      | 0.50 | 0.80 |      |
| MXI1     | K562      | 0.16 |      |      |      |
| MYC      | K562      | 0.89 | 0.50 | 0.66 |      |
| NFATC1   | Gm12878   | 0.66 |      | 0.68 |      |
| NFE2     | K562      | 0.67 |      | 0.89 |      |
| NFIC     | Gm12878   | 0.56 |      | 0.43 |      |
| NFYA     | Gm12878   | 1.14 | 0.40 |      |      |
| NFYA     | K562      | 0.95 | 0.57 | 0.77 | 0.56 |
| NFYB     | Gm12878   | 1.24 | 0.51 | 0.58 | 1.16 |
| NFYB     | K562      | 0.77 | 0.78 | 1.29 | 1.11 |
| NR2C2    | Gm12878   | 0.93 | 0.29 | 0.77 | 0.87 |
| NR2F2    | K562      | 0.47 |      | 0.43 |      |
| NRF1     | Gm12878   | 0.90 | 0.60 | 1.22 | 1.12 |
| NRF1     | K562      | 0.67 | 0.53 | 1.07 |      |
| PAX5     | Gm12878   | 0.34 |      | 0.49 |      |
| PBX3     | Gm12878   | 1.04 |      | 1.13 | 0.54 |
| PHF8     | K562      |      | 0.58 | 0.94 | 0.62 |
| PML      | Gm12878   |      | 0.44 | 0.57 |      |
| PML      | K562      |      |      | 0.26 |      |
| POLR2A   | Gm12878   | 0.99 | 0.51 | 0.87 | 0.65 |
| POLR2A   | K562      |      | 0.55 | 0.94 | 0.70 |
| POU2F2   | Gm12878   | 1.01 |      |      |      |
| RAD21    | Gm12878   |      |      | 0.69 | 0.64 |
| RAD21    | K562      | 1.08 | 0.66 | 0.71 | 0.70 |
| RBBP5    | K562      | 1.16 | 0.54 | 0.89 | 0.93 |
| RCOR1    | K562      | 0.49 |      | 0.78 |      |
| REST     | Gm12878   | 0.80 | 0.41 | 0.91 | 0.74 |
| REST     | K562      | 0.73 | 0.37 | 1.03 | 0.61 |
| RFX5     | K562      | 0.50 |      |      |      |
| RUNX3    | Gm12878   | 0.63 |      | 0.34 |      |
| SAP30    | K562      |      | 0.53 | 0.83 | 0.70 |
| SETDB1   | K562      |      |      |      | 0.71 |
| SIN3A    | Gm12878   |      | 0.52 | 0.79 | 0.70 |
| SIN3AK20 | K562      |      | 0.55 | 0.84 | 0.84 |
| SIRT6    | K562      |      |      | 0.18 |      |
| SIX5     | Gm12878   | 0.59 | 0.47 | 1.00 | 0.64 |
| SIX5     | K562      | 0.60 |      | 0.84 | 0.77 |

| DBP    | Cell line | HelT | MGW  | ProT | Roll |
|--------|-----------|------|------|------|------|
| SMC3   | Gm12878   | 1.02 | 0.73 | 0.67 | 0.76 |
| SMC3   | K562      | 1.09 | 0.58 | 0.71 | 0.77 |
| SP1    | Gm12878   | 0.83 | 0.48 | 0.76 | 0.93 |
| SP1    | K562      |      | 0.47 |      | 1.19 |
| SP2    | K562      |      | 0.50 | 0.60 | 1.14 |
| SPI1   | Gm12878   | 1.30 |      | 1.12 | 0.91 |
| SPI1   | K562      | 1.38 |      | 1.02 | 0.86 |
| SRF    | K562      |      |      | 1.08 |      |
| STAT5A | Gm12878   | 0.53 |      | 0.44 |      |
| STAT5A | K562      |      |      | 0.21 |      |
| TAF1   | Gm12878   | 1.12 | 0.57 | 1.03 | 0.70 |
| TAF1   | K562      | 1.22 | 0.57 | 1.02 | 0.72 |
| TAL1   | K562      |      |      | 0.70 |      |
| TBLXR1 | K562      | 0.53 |      | 0.31 |      |
| TCF12  | Gm12878   |      |      | 0.29 | 0.57 |
| TCF3   | Gm12878   |      |      | 0.26 |      |
| TEAD4  | K562      | 0.54 |      | 0.30 |      |
| THAP1  | K562      |      | 0.55 | 0.94 | 0.89 |
| TRIM28 | K562      | 0.51 |      | 0.56 |      |
| UBTF   | K562      | 1.25 | 0.64 | 1.04 | 0.71 |
| USF1   | Gm12878   | 0.81 | 0.48 | 0.94 | 0.93 |
| USF1   | K562      | 0.49 |      | 0.87 |      |
| USF2   | Gm12878   | 0.68 |      | 1.08 |      |
| USF2   | K562      | 0.35 |      | 0.63 |      |
| YY1    | Gm12878   |      | 0.52 | 1.03 | 0.97 |
| YY1    | K562      | 1.24 | 0.59 | 1.11 | 1.24 |
| ZBTB33 | Gm12878   | 0.34 | 0.43 | 0.53 | 0.57 |
| ZBTB33 | K562      | 0.70 | 0.46 | 0.68 | 0.61 |
| ZBTB7A | K562      | 0.98 | 0.60 | 1.02 | 0.68 |
| ZEB1   | Gm12878   | 0.92 | 0.49 | 0.77 | 0.66 |
| ZNF143 | Gm12878   |      | 0.54 | 0.85 | 0.69 |
| ZNF143 | K562      |      |      | 1.54 | 0.60 |
| ZNF263 | K562      | 0.99 | 0.50 | 0.79 | 0.89 |
| ZNF274 | K562      | 0.64 | 1.40 | 0.76 | 1.55 |

**Supplementary Table 3, related to Figure 4.**  
**Fraction (%) of top peaks that are sequence-only, shape-only, and co-occurrence.**

Every cell shows three values in the format  $f_s/f_{sh}/f_{ov}$ , where  $f_s$ ,  $f_{sh}$ , and  $f_{ov}$  denote the fraction of sequence-only, shape-only, and co-occurrence peaks, respectively.

| DBP     | Cell line | Top 500 peaks  | Top 1000 peaks | Top 2000 peaks | Top 5000 peaks | All peaks      |
|---------|-----------|----------------|----------------|----------------|----------------|----------------|
| ARID3A  | K562      | 8.0/58.0/13.4  | 7.1/56.8/12.5  | 6.5/57.4/11.2  | 5.8/55.8/10.1  | 5.4/55.7/10.0  |
| ATF1    | K562      | 27.8/2.8/54.0  | 28.2/5.6/46.2  | 25.4/9.0/37.0  | 20.3/11.6/25.4 | 16.8/13.0/18.5 |
| ATF2    | Gm12878   | 15.2/31.8/34.0 | 15.9/29.0/31.3 | 13.9/31.2/28.8 | 12.8/32.5/23.8 | 10.3/34.3/16.7 |
| ATF3    | K562      | 32.0/6.4/45.0  | 35.2/5.7/46.4  | 37.6/4.2/47.3  | 39.0/4.7/43.3  | 38.8/5.7/38.0  |
| BACH1   | K562      | 10.2/1.2/87.6  | 14.0/1.2/82.8  | 17.6/2.6/75.5  | -/-/-          | 20.0/4.0/67.4  |
| BATF    | Gm12878   | 21.8/7.0/58.8  | 21.6/6.6/57.6  | 21.9/6.8/52.7  | 21.2/7.7/49.5  | 18.2/9.6/39.3  |
| BCL11A  | Gm12878   | 28.0/22.4/35.8 | 26.7/21.5/37.2 | 27.2/21.6/35.7 | 26.9/21.5/33.2 | 25.5/23.4/29.4 |
| BCL3    | Gm12878   | 28.2/4.0/52.2  | 30.9/4.8/44.9  | 30.7/5.1/39.8  | 30.9/5.5/28.7  | 30.2/5.4/21.0  |
| BHLHE40 | Gm12878   | 36.4/1.0/49.2  | 36.6/1.8/45.9  | 36.7/3.8/40.4  | 34.7/5.8/29.8  | 30.1/7.4/23.4  |
| BHLHE40 | K562      | 37.2/1.6/51.2  | 38.5/2.7/47.2  | 38.0/3.5/42.2  | 35.7/4.3/35.7  | 28.4/5.5/26.7  |
| BRCA1   | Gm12878   | -/-/-          | -/-/-          | -/-/-          | -/-/-          | 17.9/1.9/76.9  |
| CBX3    | K562      | 13.0/37.2/33.6 | 12.2/40.9/28.6 | 10.6/43.6/24.3 | 8.6/47.5/17.8  | 7.2/50.1/12.9  |
| CCNT2   | K562      | 39.8/4.8/33.4  | 37.0/5.3/35.6  | 35.8/6.2/36.9  | 33.4/8.0/34.4  | 30.9/9.5/29.2  |
| CEBPB   | K562      | 37.6/1.0/60.8  | 36.9/1.3/60.7  | 38.3/1.5/58.8  | 39.9/3.2/54.1  | 41.4/5.4/47.0  |
| CHD2    | Gm12878   | 17.8/11.8/65.8 | 16.5/14.0/61.8 | 16.2/16.6/53.5 | 12.6/20.5/41.2 | 11.0/24.0/32.8 |
| CHD2    | K562      | 40.8/4.0/46.4  | 41.2/5.2/42.9  | 40.0/6.8/39.0  | -/-/-          | 38.3/7.5/33.7  |
| CTCF    | Gm12878   | 27.8/0.2/71.6  | 28.8/0.1/70.8  | 29.8/0.1/69.8  | 32.2/0.2/67.3  | 41.7/1.3/55.1  |
| CTCF    | K562      | 37.6/0.0/62.4  | 36.4/0.0/63.4  | 35.5/0.0/64.2  | 37.8/0.1/61.7  | 47.5/1.2/48.7  |
| CTCFL   | K562      | 24.6/2.6/71.2  | 26.2/2.1/69.7  | 28.6/2.0/66.8  | 32.1/2.6/61.6  | 34.8/3.1/57.6  |
| E2F4    | Gm12878   | 29.8/8.4/55.2  | 26.4/11.0/53.8 | -/-/-          | -/-/-          | 21.3/14.1/48.9 |
| E2F4    | K562      | 24.8/3.8/62.0  | 22.2/5.3/62.3  | 19.2/8.6/59.2  | -/-/-          | 18.8/9.3/57.7  |
| E2F6    | K562      | 12.0/7.6/77.4  | 11.3/9.2/75.1  | 11.8/12.6/70.0 | 11.6/17.1/62.3 | 11.6/19.8/57.1 |
| EBF1    | Gm12878   | 43.2/0.6/49.8  | 43.1/1.3/47.8  | 41.4/2.3/44.3  | 38.8/3.9/38.4  | 32.5/7.7/27.4  |
| EGR1    | Gm12878   | 31.8/0.0/67.6  | 32.8/0.0/66.8  | 36.1/0.0/63.4  | 40.7/0.3/57.5  | 45.5/0.8/49.3  |
| EGR1    | K562      | 36.8/0.0/62.6  | 38.9/0.0/60.4  | 40.3/0.1/59.0  | 44.6/0.1/54.7  | 52.3/0.5/44.0  |
| ELF1    | Gm12878   | 13.0/2.0/83.8  | 15.0/2.7/79.6  | 17.9/4.3/74.8  | 23.0/9.3/61.3  | 24.5/17.7/39.6 |
| ELF1    | K562      | 13.8/1.0/85.2  | 17.0/1.7/81.1  | 20.1/2.5/76.2  | 25.1/3.8/68.6  | 29.9/9.0/54.9  |
| ELK1    | Gm12878   | 26.6/4.6/63.8  | 26.3/6.8/59.8  | 23.3/13.8/47.5 | -/-/-          | 22.0/16.3/42.8 |
| EP300   | Gm12878   | 25.0/24.6/32.0 | 25.1/24.5/32.8 | 24.4/24.4/32.8 | 25.1/23.6/31.3 | 25.1/24.1/26.9 |
| EP300   | K562      | 16.8/19.8/51.2 | 16.1/22.7/50.9 | 15.9/23.9/49.8 | 15.6/26.3/45.8 | 14.0/30.7/37.5 |
| ETS1    | Gm12878   | 39.6/2.8/51.6  | 37.3/3.5/51.7  | -/-/-          | -/-/-          | 34.2/4.8/50.1  |
| ETS1    | K562      | 21.4/21.0/48.4 | 18.8/22.6/48.8 | 16.3/26.2/46.2 | -/-/-          | 15.8/28.0/42.9 |
| FOS     | K562      | 27.2/0.0/72.8  | 28.4/0.0/71.4  | 31.9/0.0/67.5  | 36.2/0.3/61.0  | 36.9/0.6/55.7  |
| FOSL1   | K562      | 25.2/0.0/70.8  | 28.0/0.2/68.2  | 32.4/0.1/63.4  | 36.6/0.4/57.0  | 37.6/0.5/51.7  |
| FOXM1   | Gm12878   | 11.0/30.4/43.2 | 12.8/30.9/41.1 | 12.2/31.8/39.6 | 11.3/33.2/34.1 | 9.8/35.5/26.2  |
| GABPA   | Gm12878   | 13.8/1.4/84.6  | 16.5/2.8/78.5  | 18.1/6.7/70.7  | -/-/-          | 18.1/14.5/59.3 |
| GABPA   | K562      | 10.8/3.0/84.6  | 11.3/6.3/78.1  | 12.3/11.4/64.5 | 12.1/19.3/46.2 | 11.5/22.7/40.8 |
| GATA1   | K562      | 16.2/14.4/66.4 | 16.1/17.4/62.6 | 15.1/20.1/59.3 | -/-/-          | 15.3/21.2/57.7 |
| GATA2   | K562      | 14.4/23.2/53.4 | 14.4/25.2/50.9 | 15.4/27.1/46.4 | 14.9/30.9/41.1 | 14.4/33.3/37.1 |
| HMGN3   | K562      | 19.0/2.2/61.0  | 17.6/2.9/62.3  | 17.6/3.4/61.1  | 18.6/4.6/57.0  | 19.1/4.8/55.5  |
| IKZF1   | Gm12878   | 1.0/64.2/30.6  | 1.2/63.6/31.7  | 1.1/64.3/31.0  | 1.8/67.4/26.6  | 1.8/67.5/26.2  |
| IRF4    | Gm12878   | 31.8/9.4/47.6  | 35.6/8.7/43.4  | 36.5/8.9/41.2  | 36.4/8.7/37.4  | 34.5/9.9/28.8  |

| DBP    | Cell line | Top 500 peaks  | Top 1000 peaks | Top 2000 peaks | Top 5000 peaks | All peaks      |
|--------|-----------|----------------|----------------|----------------|----------------|----------------|
| JUN    | K562      | 30.8/0.2/67.4  | 34.6/0.7/62.7  | 37.1/0.9/59.2  | 42.3/1.7/51.1  | 42.9/2.0/48.1  |
| JUNB   | K562      | 33.2/0.8/64.2  | 34.7/1.3/61.1  | 36.5/1.6/57.1  | 37.6/2.6/49.5  | 35.8/4.2/42.6  |
| JUND   | K562      | 38.2/0.4/60.6  | 41.9/0.4/55.9  | 44.8/0.6/51.8  | 48.3/1.3/43.3  | 41.0/3.3/27.4  |
| KAP1   | K562      | 3.6/45.6/49.6  | 3.1/49.2/45.8  | 3.5/51.6/42.5  | 3.0/55.4/38.2  | 3.1/55.7/37.8  |
| KDM5B  | K562      | 7.0/31.0/49.8  | 5.5/30.8/50.9  | 6.3/30.4/49.2  | 6.2/33.5/43.6  | 6.2/33.7/43.0  |
| MAFF   | K562      | 36.0/0.2/63.8  | 42.9/0.1/56.2  | 46.5/0.2/51.2  | 52.0/0.3/42.9  | 58.2/0.8/28.3  |
| MAFK   | K562      | 23.4/0.4/76.2  | 28.5/0.2/70.8  | 33.7/0.6/64.8  | 37.3/1.2/59.0  | 42.3/2.9/47.1  |
| MAX    | Gm12878   | 10.4/10.6/76.2 | 11.7/15.1/68.1 | 10.9/21.2/60.8 | 10.0/31.8/44.9 | 9.6/34.3/39.8  |
| MAX    | K562      | 2.4/9.6/87.2   | 3.1/12.0/83.8  | 3.3/18.8/76.2  | 4.1/28.2/65.1  | 3.8/44.8/46.2  |
| MAZ    | Gm12878   | 24.2/0.8/72.4  | 24.5/0.9/71.7  | 26.9/1.1/68.5  | 29.8/2.0/59.5  | 30.2/2.8/44.7  |
| MAZ    | K562      | 19.8/0.8/78.2  | 23.3/1.8/72.9  | 26.4/1.9/68.5  | 31.3/3.3/59.0  | 34.0/5.5/42.9  |
| MEF2A  | Gm12878   | 25.8/11.8/57.6 | 24.5/13.0/57.8 | 22.5/19.1/52.6 | 17.7/27.8/45.1 | 13.6/36.5/32.2 |
| MEF2A  | K562      | 31.6/9.2/55.8  | 32.1/11.6/52.0 | 30.1/15.4/48.3 | -/-/-          | 27.3/21.2/41.0 |
| MEF2C  | Gm12878   | 23.2/13.4/60.6 | 20.0/15.7/61.8 | 17.4/19.8/58.9 | 15.5/26.8/48.2 | 14.8/28.3/45.8 |
| MTA3   | Gm12878   | 10.8/33.4/43.4 | 9.2/36.3/41.2  | 9.5/39.6/37.2  | 9.1/43.5/29.4  | 8.5/44.8/27.0  |
| MXI1   | Gm12878   | 23.2/17.8/45.0 | 22.9/18.1/41.1 | 21.1/20.1/36.9 | 17.1/22.5/28.6 | 13.5/21.6/21.7 |
| MXI1   | K562      | 31.2/14.0/44.2 | 29.5/17.0/34.7 | 24.1/21.2/26.8 | -/-/-          | 23.9/21.4/26.1 |
| MYC    | K562      | 22.0/6.8/63.2  | 20.9/9.2/56.7  | 19.1/12.8/49.0 | -/-/-          | 17.4/16.4/41.2 |
| NFATC1 | Gm12878   | 43.4/21.4/9.0  | 35.3/27.0/7.4  | 29.8/27.8/6.2  | 25.1/23.2/4.7  | 22.9/21.4/4.2  |
| NFE2   | K562      | 26.6/0.0/67.8  | 28.6/0.0/64.6  | -/-/-          | -/-/-          | 31.7/0.1/60.3  |
| NFIC   | Gm12878   | 17.4/20.8/38.4 | 18.4/21.3/33.7 | 17.9/21.6/30.6 | 18.0/21.1/27.1 | 14.6/22.4/18.8 |
| NFYA   | Gm12878   | 12.8/14.4/65.2 | 11.6/16.6/62.5 | -/-/-          | -/-/-          | 11.4/16.9/61.8 |
| NFYA   | K562      | 33.2/3.8/57.4  | 29.0/5.4/60.2  | 26.2/5.8/59.9  | -/-/-          | 25.5/6.3/59.3  |
| NFYB   | Gm12878   | 19.0/4.2/72.4  | 20.8/5.5/68.6  | 21.1/6.2/66.0  | 21.0/7.8/59.6  | 19.4/10.2/51.6 |
| NFYB   | K562      | 74.0/0.4/19.4  | 67.9/0.2/26.2  | 62.3/0.2/31.1  | 57.7/0.4/33.1  | 56.5/0.6/32.3  |
| NR2C2  | Gm12878   | 32.4/43.0/13.0 | -/-/-          | -/-/-          | -/-/-          | 22.2/54.3/9.5  |
| NR2F2  | K562      | 9.6/27.8/52.0  | 9.9/30.9/47.4  | 10.2/33.7/44.1 | 10.2/37.2/38.0 | 10.3/38.6/33.6 |
| NRF1   | Gm12878   | 17.0/0.0/83.0  | 20.5/0.0/79.3  | 25.1/0.2/74.2  | -/-/-          | 27.9/1.9/65.9  |
| NRF1   | K562      | 28.8/0.0/70.4  | 32.8/0.7/65.5  | -/-/-          | -/-/-          | 32.7/1.6/58.1  |
| PAX5   | Gm12878   | 28.6/10.6/55.4 | 26.9/14.2/51.3 | 25.1/19.3/46.5 | 22.5/25.2/37.9 | 21.7/28.3/30.2 |
| PBX3   | Gm12878   | 31.8/2.8/60.2  | 33.0/4.6/53.8  | 31.4/5.9/49.4  | 28.0/7.5/40.0  | 26.3/8.9/35.5  |
| PHF8   | K562      | 14.0/20.2/43.0 | 13.3/18.5/45.4 | 12.7/18.6/47.0 | 11.5/17.5/46.4 | 10.6/17.2/41.3 |
| PML    | Gm12878   | 11.0/24.2/36.4 | 9.7/23.2/40.0  | 8.8/22.4/38.3  | 7.4/19.5/30.6  | 6.8/18.8/25.2  |
| PML    | K562      | 5.4/42.6/46.0  | 5.0/42.3/45.5  | 4.8/44.0/41.8  | 4.1/48.3/34.2  | 3.6/52.2/29.4  |
| POLR2A | Gm12878   | 7.4/21.0/63.6  | 7.4/21.6/64.1  | 7.5/22.6/63.0  | 6.8/24.3/60.1  | 4.4/38.4/37.7  |
| POLR2A | K562      | 15.2/12.6/49.0 | 14.1/13.5/48.3 | 13.6/14.6/48.0 | 12.3/15.2/41.2 | 11.3/15.0/36.8 |
| POU2F2 | Gm12878   | 30.4/0.4/61.8  | 29.5/0.7/59.1  | 31.8/0.8/50.4  | 28.0/1.8/34.8  | 19.4/2.4/19.9  |
| RAD21  | Gm12878   | 48.4/0.4/49.6  | 48.0/0.4/49.9  | 49.1/0.3/48.8  | 52.4/0.3/46.0  | 56.7/1.3/35.2  |
| RAD21  | K562      | 31.8/0.4/66.8  | 33.5/0.5/65.3  | 34.9/0.3/64.0  | 38.1/0.5/60.5  | 48.7/1.6/45.1  |
| RBBP5  | K562      | 5.4/33.4/47.6  | 4.9/34.9/45.6  | 5.0/35.0/42.4  | -/-/-          | 4.0/36.1/34.5  |
| RCOR1  | K562      | 5.2/40.6/48.2  | 4.6/42.9/47.0  | 3.6/46.4/44.5  | 3.6/51.7/38.6  | 2.6/61.2/26.3  |
| REST   | Gm12878   | 25.2/0.0/74.8  | 29.9/0.0/70.0  | 37.0/0.1/62.8  | 43.3/2.6/50.6  | 42.9/3.0/49.7  |
| REST   | K562      | 18.4/0.0/81.6  | 22.8/0.0/77.2  | 32.0/0.0/67.8  | 37.9/3.2/48.8  | 34.3/7.3/34.7  |
| RFX5   | K562      | 28.8/17.6/37.8 | 23.4/22.9/27.0 | -/-/-          | -/-/-          | 23.4/22.9/26.7 |
| RUNX3  | Gm12878   | 20.0/4.6/67.2  | 20.7/6.0/64.9  | 21.6/6.5/61.0  | 21.3/8.2/55.3  | 17.1/15.9/31.5 |
| SAP30  | K562      | 10.8/26.2/46.8 | 9.8/26.3/47.2  | 8.6/24.9/45.4  | -/-/-          | 8.1/25.8/43.0  |
| SETDB1 | K562      | 38.6/7.0/20.0  | 38.4/6.9/17.9  | 36.0/6.7/15.8  | -/-/-          | 36.1/6.8/15.4  |
| SIN3A  | Gm12878   | 15.4/19.0/49.4 | 12.0/21.2/49.5 | 10.8/22.2/47.0 | 10.5/22.2/41.5 | 10.6/22.0/40.7 |

| DBP      | Cell line | Top 500 peaks  | Top 1000 peaks | Top 2000 peaks | Top 5000 peaks | All peaks      |
|----------|-----------|----------------|----------------|----------------|----------------|----------------|
| SIN3AK20 | K562      | 16.6/21.2/44.6 | 16.4/24.1/40.1 | 14.6/26.9/36.3 | -/-/-          | 13.1/28.0/32.3 |
| SIRT6    | K562      | 18.0/27.4/39.4 | 17.0/33.4/32.1 | -/-/-          | -/-/-          | 16.9/33.4/30.8 |
| SIX5     | Gm12878   | 14.8/9.0/74.6  | 13.7/12.3/69.9 | 12.7/23.1/57.0 | -/-/-          | 11.8/26.5/51.9 |
| SIX5     | K562      | 32.4/1.4/58.0  | 26.1/1.8/56.2  | -/-/-          | -/-/-          | 23.3/2.0/46.4  |
| SMC3     | Gm12878   | 20.4/0.2/77.8  | 22.8/0.7/75.1  | 26.2/1.2/71.3  | 30.9/1.3/66.4  | 35.7/3.9/53.3  |
| SMC3     | K562      | 30.2/0.8/68.2  | 30.7/0.9/67.7  | 30.4/0.8/67.7  | 34.4/0.8/62.8  | 42.7/1.8/50.7  |
| SP1      | Gm12878   | 25.0/3.2/68.4  | 23.1/3.5/68.7  | 21.4/4.7/64.4  | 20.8/7.3/51.3  | 19.5/9.6/40.7  |
| SP1      | K562      | 15.0/5.2/75.4  | 16.7/6.4/70.3  | 17.2/9.7/63.2  | -/-/-          | 17.6/10.0/61.3 |
| SP2      | K562      | 5.4/9.4/83.2   | 6.4/11.8/78.7  | -/-/-          | -/-/-          | 6.9/13.0/76.2  |
| SPI1     | Gm12878   | 33.4/0.0/66.2  | 37.9/0.0/61.7  | 41.0/0.1/58.5  | 46.4/0.1/52.9  | 56.1/0.3/40.6  |
| SPI1     | K562      | 28.2/0.0/71.6  | 32.6/0.0/67.3  | 36.0/0.0/63.8  | 41.4/0.0/58.2  | 49.2/0.2/48.6  |
| SRF      | K562      | 58.8/2.6/24.0  | 55.6/3.1/22.5  | 49.9/4.5/19.4  | -/-/-          | 49.2/4.6/18.9  |
| STAT5A   | Gm12878   | 22.8/17.2/34.4 | 19.0/19.1/31.9 | 18.8/18.7/27.5 | -/-/-          | 17.1/18.7/24.4 |
| STAT5A   | K562      | 14.0/15.2/67.4 | 14.5/19.4/61.6 | 14.0/24.8/54.9 | 13.3/30.0/48.0 | 12.8/32.1/45.1 |
| TAF1     | Gm12878   | 11.4/12.2/70.6 | 11.1/12.0/71.4 | 10.4/14.2/67.8 | 9.9/17.2/61.3  | 9.7/19.5/55.1  |
| TAF1     | K562      | 10.4/12.0/74.0 | 8.5/13.5/72.7  | 7.8/16.4/69.9  | -/-/-          | 6.6/21.7/61.6  |
| TAL1     | K562      | 28.6/17.4/39.6 | 28.4/18.4/37.4 | 29.9/18.9/34.9 | 29.9/21.5/31.8 | 26.7/24.4/27.9 |
| TBLXR1   | K562      | 9.0/42.2/42.2  | 8.1/44.3/39.7  | 8.1/45.4/36.5  | -/-/-          | 7.7/49.3/30.7  |
| TCF12    | Gm12878   | 12.0/4.2/82.4  | 14.0/4.0/80.5  | 13.2/6.0/78.5  | 13.1/10.3/72.2 | 12.1/17.2/63.7 |
| TCF3     | Gm12878   | 22.0/4.4/70.2  | 23.0/6.2/66.1  | 22.8/7.1/63.5  | 21.1/11.5/57.5 | 19.2/16.6/51.5 |
| TEAD4    | K562      | 15.4/28.8/44.0 | 15.2/30.2/42.7 | 15.4/30.2/42.0 | 15.4/31.9/37.5 | 12.4/37.3/27.1 |
| THAP1    | K562      | 33.0/8.0/44.4  | -/-/-          | -/-/-          | -/-/-          | 28.1/9.9/43.3  |
| TRIM28   | K562      | 5.8/52.4/36.4  | 5.0/50.7/37.2  | 4.8/51.6/36.1  | 5.0/53.6/32.3  | 4.5/55.2/29.1  |
| UBTF     | K562      | 7.2/8.4/80.6   | 7.4/10.8/74.8  | 8.1/12.7/66.0  | -/-/-          | 8.3/12.8/64.9  |
| USF1     | Gm12878   | 5.6/0.6/93.4   | 9.3/1.5/89.0   | 14.9/2.1/82.2  | 19.3/5.1/73.2  | 20.0/8.1/67.8  |
| USF1     | K562      | 30.4/0.4/68.0  | 35.2/0.3/62.9  | 40.8/0.2/56.1  | 46.4/0.3/48.9  | 49.1/0.5/41.0  |
| USF2     | Gm12878   | 38.4/0.2/59.2  | 46.7/0.5/49.5  | 53.9/0.5/39.5  | 57.6/0.7/28.5  | 56.5/0.8/25.7  |
| USF2     | K562      | 44.0/0.4/53.2  | 46.3/0.3/50.3  | -/-/-          | -/-/-          | 43.5/1.1/44.6  |
| YY1      | Gm12878   | 24.2/1.2/74.2  | 25.5/0.9/72.5  | 27.9/3.2/65.9  | 28.7/14.7/47.7 | 24.7/26.5/24.9 |
| YY1      | K562      | 11.0/1.6/87.2  | 11.3/5.3/83.1  | 11.1/13.7/74.0 | 10.5/29.1/57.2 | 10.7/30.7/55.1 |
| ZBTB33   | Gm12878   | 21.4/7.2/64.2  | -/-/-          | -/-/-          | -/-/-          | 19.8/14.2/52.3 |
| ZBTB33   | K562      | 36.8/2.8/51.0  | 33.8/3.2/46.9  | -/-/-          | -/-/-          | 32.7/3.5/42.0  |
| ZBTB7A   | K562      | 19.8/1.6/77.4  | 22.0/2.0/73.9  | 20.9/2.0/73.3  | 22.4/3.6/68.4  | 26.1/5.3/60.4  |
| ZEB1     | Gm12878   | 11.4/9.2/78.4  | 12.3/12.4/72.2 | 11.7/16.3/66.7 | -/-/-          | 12.1/20.5/61.0 |
| ZNF143   | Gm12878   | 39.6/1.0/58.4  | 36.4/5.1/55.3  | 29.0/16.4/40.1 | 21.2/21.3/23.6 | 17.4/18.3/13.2 |
| ZNF143   | K562      | 39.6/0.2/58.6  | 41.4/1.4/50.6  | 49.9/2.2/34.8  | 57.6/2.9/21.7  | 53.2/4.5/12.3  |
| ZNF263   | K562      | 18.8/1.6/78.2  | 22.3/2.6/72.0  | 25.2/4.8/63.9  | -/-/-          | 24.9/5.8/62.5  |
| ZNF274   | K562      | -/-/-          | -/-/-          | -/-/-          | -/-/-          | 24.0/10.5/46.4 |



**Table S4, related to Figure 4. Number of datasets where the highest fraction of peaks is sequence-only, co-occurrence, or shape-only across different affinity bins**

| Affinity bin      | Sequence-only | Co-occurrence | Shape-only |
|-------------------|---------------|---------------|------------|
| 10 (top-most 10%) | 7             | 113           | 5          |
| 9                 | 8             | 105           | 7          |
| 8                 | 11            | 97            | 9          |
| 7                 | 17            | 92            | 9          |
| 6                 | 16            | 84            | 13         |
| 5                 | 17            | 82            | 16         |
| 4                 | 21            | 76            | 17         |
| 3                 | 21            | 73            | 20         |
| 2                 | 23            | 70            | 20         |
| 1 (lowest 10%)    | 24            | 65            | 23         |
